# Supplementary material for: The Apostasia genome and the evolution of orchids
Source: PubMed Central journal article supplement (PMC7416622; doi:10.1038/nature23897), 2017-09-13
Supplement: 41586_2017_BFnature23897_MOESM1_ESM.pdf [file 41586_2017_BFnature23897_MOESM1_ESM.pdf]

## Supplementary Notes

### 1 Evolution of gene families

#### 1.1 Evolution of gene family sizes

We determined the expansion and contraction of orthologous gene families using CAFÉ 2.2<sup>1</sup>. One hundred and thirteen gene families were expanded in the lineage leading to the orchids, whereas 1,047 families became smaller (**Figure 1**). Five hundred and twenty-two gene families were expanded in *A. shenzhenica* (six by a significant margin), compared to 557 (five by a significant margin) in *P. equestris* and 872 (34 by a significant margin) in *D. catenatum*. At the same time, 1,661 (four by a significant margin) gene families became smaller in *A. shenzhenica* compared to 1,384 (27 by a significant margin) in *P. equestris* and 703 (one by a significant margin) in *D. catenatum* (**Supplementary Tables 15–18**).

#### 1.2 Orchidaceae-specific gene families

A four-way comparison of Orchidaceae (*A. shenzhenica*, *D. catenatum*, and *P. equestris*), dicots (*A. thaliana*, *P. trichocarpa*, and *V. vinifera*), Poales (*A. comosus*, *B. distachyon*, *O. sativa*, and *S. bicolor*), and a group of *M. acuminata* and *P. dactylifera* found 10,377 gene families to be shared by all taxa (**Extended Data Figure 3**). In addition, 474 gene families present in all three orchid genomes are found to be unique to Orchidaceae, suggesting that orchids have fewer unique gene families than the three dicots (522), but much more than the four Poales (180).

For the *A. shenzhenica*-specific gene families, we conducted a Gene ontology (GO) / Kyoto Encyclopedia of Genes and Genomes (KEGG) enrichment analysis via enrichmentpipeline (<https://sourceforge.net/projects/enrichmentpipeline/>) and found

enrichment of the GO Terms ‘RNA-directed DNA polymerase activity’, ‘RNA-dependent DNA replication’ (**Supplementary Table 19**). The Orchidaceae-specific gene families were found to be enriched for GO terms ‘Cysteine-type peptidase activity’, ‘O-methyltransferase activity’ and the KEGG pathways ‘Flavone and flavonol biosynthesis’, ‘Stilbenoid, diarylheptanoid and gingerol biosynthesis’ (**Supplementary Tables 20 and 21**). The monocot-specific gene families were enriched for the GO terms ‘two-component response regulator activity’, ‘solute antiporter activity’, ‘two-component signal transduction system’, ‘signal transducer activity’ and ‘molecular transducer activity’, ‘hydrogen ion transmembrane transporter activity’ and the KEGG pathways ‘Plant hormone signal transduction’ and ‘RNA polymerase’ (**Supplementary Tables 22 and 23**).

O-methyltransferases can collectively mono- or polymethylate a great number of plant natural products. The methylation of plant natural products can alter their solubility and intracellular compartmentalization and can increase their antimicrobial activity<sup>2</sup>. For instance, amongst the genes with O-methyltransferase activity, Ash015798 is highly expressed in stem and seed, while significant expression of Ash015796 is detected in floral buds, stems, leaves and seeds (**Supplementary Figure 21**). Flavonoids and related phenolic compounds have essential functions in protecting plants against pathogens. The evolution of flavonoids has enabled vascular plants to cope with pathogen attacks and damaging UV light<sup>3</sup>. Ash006087, a gene involved in flavone and flavonol biosynthesis, and predominantly expressed in stems and roots, might play a protective role in vegetative tissues (**Supplementary Figure 22**). Stilbenes are a small family of plant secondary metabolites that are found in a limited number of plant species, such as *Vitis sylvestris*<sup>4</sup>. Stilbenes are important phytoalexins that accumulate in response to various biotic and abiotic stresses, and increasing evidence suggests a positive correlation between the stilbene content of plants and disease resistance<sup>5</sup>. The two tandem duplicates, Ash006321 and Ash006322, which are involved in the biosynthesis of stilbenoids, diarylheptanoids, and gingerol,

are both highly expressed in flower buds, stems and seeds, and likely have important functions against stresses (**Supplementary Figure 23**).

In addition, the GO-term ‘cysteine-type peptidase activity’ seem to be specifically enriched (**Supplementary Table 20**). Cysteine proteases are an important class of enzymes implicated in both developmental and defense-related programmed cell death and other biological processes in plants<sup>6</sup>. The *Arabidopsis* papain-like cysteine protease CEP1 for instance is involved in tapetal programmed cell death and pollen development<sup>7</sup>. In addition, in *Arabidopsis*, cysteine proteases such as aleurain-like proteases, cathepsin B-like proteases, and vacuolar processing enzymes are correlated with the remobilization of seed storage proteins during seed germination<sup>6</sup>. Among *A. shenzhenica* cysteine-type peptidase genes, significant expression of Ash003370 could be detected in the flower bud, stem, leaf, and seed (**Supplementary Figure 24**). Gene Ash003370 thus likely plays important roles in the reproductive and vegetative development of *A. shenzhenica*, but further studies are necessary to unravel its precise functional role.

## 2 Whole genome duplication

### 2.1 $K_S$ distributions and absolute phylogenomic dating

Analyses of the number of synonymous substitutions per synonymous site ( $K_S$ ) in *A. shenzhenica* for both the whole paranome (the set of all duplicated genes in the genome, **Extended Data Figure 4a**) and ‘anchor’ duplicates retained in co-linear regions only (i.e., excluding duplicates from small-scale duplications, **Extended Data Figure 4b**) consistently identified a clear peak of duplicates with a  $K_S$  value close to 1. The  $K_S$  distributions generated from the genomes of the epidendroid orchids *P. equestris*<sup>8</sup> and *D. catenatum*<sup>9</sup> and from transcriptomes of nine additional orchids (together covering all five orchid subfamilies) all show similar  $K_S$  peaks with  $K_S$  values of 0.7 to 1.1 (**Supplementary Figure 2**). In the apostasioid *Neuwiedia*

*malipoensis*, a prominent second peak at a much lower  $K_S$  value of about 0.25 may signify a more recent and *Neuwiedia*-specific second WGD (in contrast, the peaks at  $K_S$  values  $< 0.2$  as apparent in the genomes of *D. catenatum*, *P. equestris* and *A. shenzhenica* stem from background (tandem) duplications and most likely do not signify additional recent WGDs).

We constructed  $K_S$ -based age distributions of the one-to-one orthologues of *A. shenzhenica* and *Asparagus officinalis* (asparagus, family Asparagaceae, a sister family to Orchidaceae) (GenBank accession GCF\_001876935.1), *A. shenzhenica* and *P. equestris*, *A. shenzhenica* and *D. catenatum*, and *P. equestris* and *D. catenatum* (each representing the divergence event between the two respective species) and compared these to the distributions of the duplicated anchors from each of the three orchids for which we have a genome (**Figure 2a**). The peaks of the three anchor-pair distributions all have lower  $K_S$  values than the peak of the *A. shenzhenica*–*A. officinalis* orthologue distribution, indicating that the WGD signatures are specific to Orchidaceae and not shared with other non-orchid Asparagales (see also **Supplementary Figures 2 and 25**). They also all have higher  $K_S$  values than the peak of the *P. equestris*–*D. catenatum* orthologue distribution, confirming a WGD event that is shared at least between these two species, as reported previously<sup>9</sup>. The anchor-pair distributions of *A. shenzhenica* and *P. equestris* are also slightly shifted towards higher  $K_S$  values compared with the *A. shenzhenica*–*P. equestris* and *A. shenzhenica*–*D. catenatum* orthologue distributions (each of which represents the divergence between the *A. shenzhenica* lineage and the rest of the Orchidaceae), whereas the anchor pair distribution of *D. catenatum* largely overlaps with these two orthologue distributions. *D. catenatum* likely has a slightly lower substitution rate, as hinted by the slightly “younger” peak of the *A. shenzhenica*–*D. catenatum* orthologue distribution compared to the *A. shenzhenica*–*P. equestris* orthologue distribution (also compare the orchid–*A. officinalis* orthologue distributions in **Supplementary Figure 2**, long-dashed versus dashed vertical yellow lines for *D. catenatum* and *P. equestris*).

These patterns suggest that the WGD(s) and the initial orchid speciation events occurred relatively closely in time and that the WGD events evident in the three orchid genomes (and, by extension, those in the orchid transcriptomes) could represent a single event, slightly older than their divergence, and thus shared among all orchids. However, the distance between the peaks is small, there is substantial overlap among the distributions and the number of anchor pairs we could extract is relatively low for all three species. In addition, some heterogeneity in substitution rate between these species is expected given the age of the events and this is apparent in the one-to-one orthologue  $K_S$  distributions with *A. officinalis* (yellow distributions and long-dashed vertical yellow lines versus dashed vertical yellow lines in each panel of **Supplementary Figure 2**).

We performed absolute phylogenomic dating<sup>10</sup> of the WGD event identified from the *A. shenzhenica* genome to determine its age in relation to orchid phylogeny. Paralogous gene pairs present under the WGD peak in the *A. shenzhenica*  $K_S$  distributions (**Extended Data Figures 4a** and **b**) were dated (see **Methods**) and the resulting absolute age distribution showed a peak at 74 million years ago (Ma) with a 90% confidence interval of 72–78 Ma (**Extended Data Figure 5**). This estimate of the date of the WGD event in the *A. shenzhenica* lineage coincides with the date estimated for the WGD event in the *P. equestris* lineage (76 Ma, 90% CI: 72–81 Ma<sup>8</sup>). Estimates for the crown age of extant orchids, i.e., the time of divergence of the *A. shenzhenica* lineage from the lineage that gave rise to the rest of the Orchidaceae, vary widely and range from 54 Ma to 121 Ma (Ramírez *et al.*<sup>11</sup>: 71–90 Ma, youngest mean minus 1 SD to oldest mean plus 1 SD; Gustafsson *et al.*<sup>12</sup>: 63–92 Ma, 95% HPD; Chen *et al.*<sup>13</sup>: 54–82 Ma, 95% HPD; Chomicki *et al.*<sup>14</sup>: 75–121 Ma, 95% HPD; Givnish *et al.*<sup>15,16</sup>: 80–100 Ma, 95% CI; see also **Figure 1** and **Extended Data Figure 2**), but again suggest that the initial divergence of extant orchid lineages and any single or multiple ancient orchid WGD event(s) likely occurred closely together in time. Some of these ranges would support the possibility of a single shared WGD

in the most recent common ancestor of extant orchids indicated in the  $K_S$ -based age distributions, as discussed above (**Figure 2a**), though our date estimate for such an event would fall towards the lower end of most of those range estimates.

## 2.2 Co-linearity and synteny analyses

Co-linearity analysis (see **Methods**) of *A. shenzhenica* indicated that 43.85% of the genome retains paralogous genes from WGD events, with 7,271 (33.31%), 1,423 (6.52%), 669 (3.06%), and 210 (0.96%) genes on co-linear regions with two, three, four, and five paralogous segments, respectively, suggesting two WGD events that can be identified in the current *A. shenzhenica* genome (**Figure 2b** and **Supplementary Figure 3**). One of the WGD events seems much more recent than the other because co-linear regions consisting of three and four segments are much rarer than those with two, which almost cover one third of the genome. The few co-linear regions with five segments (making up less than 1% of the genes) might be remnants of a more ancient third WGD event.

To circumscribe the two WGD events, we compared the genome of *A. shenzhenica* with the genomes of several other flowering plants: the earliest-diverging extant angiosperm *Amborella trichopoda*, the dicot *Vitis vinifera*, and the two monocots *Ananas comosus* (pineapple, order Poales) and *Asparagus officinalis*. Due to the fragmented nature of the current genome assembly of *A. shenzhenica*, counting the number of co-linear segments in a comparison of *A. shenzhenica* with other species did not directly unveil the number of individual WGDs. We thus illustrated duplication depth, i.e., the number of overlapping co-linear segments at a broader genomic region, by mapping such co-linear segments onto their corresponding orthologous regions in the other species (see **Methods**). The pairwise comparisons with *A. trichopoda* and *V. vinifera* both support at least two WGDs in *A. shenzhenica* (**Supplementary Figures 4 and 5**) consistent with the

*A. shenzhenica* self-comparison (**Figure 2b**).

In comparison with *A. comosus*, for each co-linear segment in *A. shenzhenica* we found mostly up to four orthologous co-linear segments in *A. comosus* and vice versa for each *A. comosus* segment mostly up to four orthologous segments in *A. shenzhenica* (**Extended Data Figure 6**). Such a 4:4 pattern is consistent with the two monocot WGDs that have been proposed in the evolutionary history of *A. comosus*, the  $\tau$  WGD<sup>17, 18</sup> shared by most monocots and the  $\sigma$  WGD shared by all Poales<sup>18</sup>. In some of these co-linear regions, four co-linear segments in *A. shenzhenica* corresponded to a specific set of four co-linear segments in *A. comosus* (on chromosomes LG4, LG13, LG18 and LG23) which have been shown to originate from one of the seven ancestral pre- $\tau$ -WGD chromosomes in monocots (Anc6) (**Extended Data Figure 6** and Figures 2 and 3c in Ming *et al.*<sup>18</sup>). This and the 4:4 co-linearity pattern indicate that *A. shenzhenica* followed a similar evolutionary trajectory with regard to WGDs as *A. comosus*, with one (Orchidaceae-)lineage-specific WGD in addition to the shared  $\tau$  WGD. Consistently, by tightening and relaxing the criterion influencing duplication depth (i.e., the required number of anchors on the co-linear segments) we could distinguish these two WGDs (and a putative older third event) (**Supplementary Figures 6 and 7**). Similarly, the comparison between *A. shenzhenica* and *A. officinalis* showed much the same pattern as the comparison between *A. shenzhenica* and *A. comosus* (suggesting *A. officinalis* also has one independent Asparagaceae-specific WGD; also see **Supplementary Figure 25**), but with less paralogous segments retained from the  $\tau$  WGD (**Supplementary Figure 8**).

### 2.3 Gene tree analyses

To further corroborate the timing of the WGD events relative to orchid and monocot divergences, we constructed and analysed gene trees that included genes

from 12 orchid species across the five subfamilies of Orchidaceae, four non-orchid Asparagales, three Poales, and *A. trichopoda* (see **Methods**). We selected the subset of trees that contained at least one pair of duplicated anchor genes from co-linear regions from one of the three orchids with complete genome information (*A. shenzhenica*, *D. catenatum* and *P. equestris*; i.e., we only used gene families that also had ‘spatial/structural’ evidence of a WGD event) and mapped the coalescence points of these anchor pairs onto the species phylogeny (see **Methods**; see also **Supplementary Figure 20**). Overall, the anchor-pair coalescence points in nearly half of such gene family trees, containing the majority of anchor pairs from *D. catenatum* and *P. equestris* and the largest fraction of anchor pairs from *A. shenzhenica*, mapped onto the orchid stem branch, providing support for a WGD event shared by all orchids (**Figure 3**). The anchor pairs in most of the remaining gene family trees mapped either onto the branch leading to all the included monocots, again providing support for the ancient  $\tau$  WGD event shared by these monocots<sup>17,18</sup>, or onto the two first diverging/descending branches from the orchid ancestor (**Figure 3**). A low number of anchor pairs from *D. catenatum* and *P. equestris* mapped along the internal orchid branches leading to Epidendroideae. However, even though the largest fraction of *A. shenzhenica* anchor pairs mapped onto the orchid stem branch (76), a substantial fraction of anchor pairs (70) actually mapped onto the Apostasioideae stem branch. These could be considered support for an additional WGD event in the Apostasioideae lineage. However, the co-linearity analyses discussed above suggest only one WGD event unique to Orchidaceae in the evolutionary history of *A. shenzhenica*. Therefore, we believe the large number of anchor points mapped on the Apostasioideae stem branch to be due to phylogenetic discordance as a result of the probably very short time interval between the shared WGD event and the divergence of Orchidaceae.

Such phylogenetic discordance could theoretically be due to incomplete lineage sorting (or other difficulties in tree inference when short branches are involved due to short time intervals between successive phylogenetic events, or, alternatively, due to



homeologous recombination). A possible scenario for a specific gene (tree) is illustrated in **Supplementary Figure 26**. A gene in the common ancestor of all extant orchids was polymorphic before the shared orchid-specific WGD, i.e., it had two diverging alleles, G and G'. Then both alleles got duplicated during the WGD, resulting in two paralogous loci with a total of four alleles that were retained in the early orchid polyploid. If the ancestral orchid speciation event followed relatively soon after the WGD event, all four alleles may have been retained in the two diverging orchid species, which gave rise to the ancestors of the current Apostasioideae (which includes *A. shenzhenica*) and the ancestors of the rest of the orchid families including the lineage eventually leading to Epidendroideae (which includes *P. equestris* and *D. catenatum*), respectively. Over time, if both paralogous loci are retained in the current orchids and if we assume, for simplicity, that alleles eventually became fixed at the paralogous loci, i.e., two of the four alleles got lost owing to genetic drift or selection, then only two of the alleles were retained at the paralogous loci forming an anchor pair. As a result, the coalescence points of such anchor pairs in the current species depend on which of the alleles were finally fixed at the paralogous loci in a species. There are in total 36 possible combinations of any two fixed alleles from each species (in a species/gene tree with two species), but only three possible coalescence points on branches in the species-level phylogenetic tree, i.e., the stem branch of Orchidaceae or one of the two early-diverging branches of Orchidaceae after the ancestral speciation event. We elaborate on four examples in **Supplementary Figure 26**. If all the retained anchors are all from one ancestral allele (**Supplementary Figure 26A**, all from allele G), the coalescence points of the two anchor pairs are both the duplication (i.e., WGD) event and they fall onto the orchid stem branch. If one ancestral species kept anchors from different alleles (**Supplementary Figure 26B** and **C**, species A and E, respectively, one from allele G and the other from allele G') and the other ancestral species kept anchors from the same allele (**Supplementary Figure 26B** and **C**, species E and A, respectively, all from allele G), then the coalescence point of one of the anchor pairs is the duplication

event (e.g., of  $E_1$  and  $E_2$  in **Supplementary Figure 26B**) and the coalescence point of the other anchor pair is actually the divergence event of the two ancestral alleles (e.g., of  $A_1$  and  $A'_2$  in **Supplementary Figure 26B**). Therefore, both coalescence points map onto the orchid stem branch but seemingly indicate different phylogenetic events. In the fourth example, if one ancestral species retained both anchors from one allele (**Supplementary Figure 26D**, species A, both from allele  $G'$ ) while the other ancestral species retained both anchors from the other allele (**Supplementary Figure 26D**, species E, both from allele  $G$ ), then although the two coalescence points reflect the duplications of each of the two alleles (during shared orchid WGD event) they actually erroneously map onto the two orchid subbranches.

To substantiate our hypothesis on discordance in anchor-pair mapping due to incomplete lineage sorting, we additionally built gene families as described in **Methods** ('Identification of WGD events in *A. shenzhenica* and phylogenomic analyses'), but now only using the three orchid genomes, plus *Asparagus officinalis* and *Amborella trichopoda*. Phylogenetic trees of 2,573 gene families were reconstructed and rooted for gene families that had at least five genes, with at least one gene from *A. trichopoda*, *A. officinalis*, and *A. shenzhenica* plus at least one gene from either *P. equestris* or *D. catenatum* and at least one duplicate pair in at least one of the three orchid species. For computational reasons, gene families with more than 200 genes were removed from further analysis. We traversed this full set of the 2,573 rooted gene trees to explore tree topologies related to duplication events in orchids based on all paralogues and not just the limited set of anchor pairs (**Supplementary Figure 27**).

We first extracted subtree(s) from each node for which the node itself included genes only from the orchids and the sister clade had genes from *A. officinalis* and/or *A. trichopoda*. Subtrees that did not have genes from at least *A. shenzhenica* and one other orchid plus a pair of paralogues were removed. Based on these criteria, we obtained 2,085 subtrees from 1,864 rooted gene trees. The subtrees were explored to

look for expected topologies supporting the corresponding topologies under the four different scenarios described in **Supplementary Figure 26**. The expected gene tree topologies, including those with gene loss and/or incomplete sampling taken into account (see below), are illustrated in **Supplementary Figure 26E**. The bootstrap values on the branches leading to nodes that were used to distinguish different topologies, i.e., whether the nodes represented speciation or duplication events, were used to evaluate the support for such events with a cutoff of greater than or equal to 50%. We found 167, 39, 45, and 72 gene trees that showed subtrees with the expected topologies under the respective four scenarios as depicted in **Supplementary Figure 26A–D**. The first three topologies thus support a (whole-genome) duplication event that occurred before the divergence of Orchidaceae, while the gene trees of the last topology could erroneously support two duplication events, each occurring on one of the two subbranches of Orchidaceae (**Supplementary Figure 26E**). Due to extensive gene loss (the most common fate for duplicated genes) and/or incomplete sampling, the resulting gene trees may have a second set of four prevalent topologies consisting of only three retained genes (i.e., one lost or non-sampled gene). Two of these topologies support a coalescence point on the stem branch of Orchidaceae (we found 548 and 296 such gene trees), one topology could erroneously support a coalescence point on the subbranch of Orchidaceae leading to Epidendroideae (we found 429 such gene trees), and the fourth topology could erroneously support a coalescence point on the stem branch of Apostasioideae (we found 267 such gene trees) (**Supplementary Figure 26E**). Considering all these scenarios together, we found that there were fewer gene (sub)trees with duplicated genes from *A. shenzhenica* than gene (sub)trees with duplicated genes from Epidendroideae, indicating massive gene loss in *A. shenzhenica*. In total, 1,450 gene families with 1,620 subtrees were considered among the 1,864 gene families with 2,085 subtrees.

### 3 MIKC\*-type genes and the evolution of the pollinium

MIKC\*-type genes are one of the major regulators of the male gametophytic developmental programme. These genes were shown to have a conserved function in both *Arabidopsis* and rice pollen development<sup>19</sup>. MIKC\*-type genes are present in all major groups of land plants, including bryophytes, lycophytes, ferns, gymnosperms, and angiosperms<sup>20</sup>. In seed plants, two different monophyletic groups of MIKC\*-type genes could be identified, the P- and S-subclades<sup>20</sup>. The former, however, is absent in all orchids except *A. shenzhenica* (**Extended Data Figure 8**).

In rice, there are two S-subclade MIKC\* genes, *MADS62* and *MADS63*, and one P-subclade *MADS68* gene. All three rice genes are specifically expressed late in pollen development<sup>19</sup>, which resembles the expression of *AGL66*, *AGL104*, and *AGL30* in *Arabidopsis*<sup>21</sup>. This suggests that a pollen-specific expression pattern was already established in the most recent common ancestor of monocots and eudicots. The single knockdown or knockout lines, respectively, of the S-subclade *MADS62* and *MADS63* in rice did not show a mutant phenotype, but lines in which both S-subclade genes were affected showed severe defects in pollen maturation and germination<sup>19</sup>. This indicates that the two S-subclade genes of *MADS62* and *MADS63* act redundantly in pollen development, as do their homologs *AGL66* and *AGL104* in *Arabidopsis*<sup>22, 23</sup>.

In *Arabidopsis* no complete knockout or a knockdown of P-subclade genes were achieved. The down-regulation of the sole rice P-subclade gene *MADS68* in RNAi transgenic lines resulted in defects in pollen maturation and germination<sup>23</sup>. Taken together, both S- and P-subclade MIKC\*-type genes confer an indispensable and highly conserved function in pollen maturation and germination in the monocot rice as well as in the eudicot *Arabidopsis*.

Therefore, it is possible that the loss of the P-subclade members of MIKC\*-type genes is related to the evolution of the pollinium. During pollen development, a pollen

mother cell undergoes meiosis to produce four haploid microspores, which are first packaged in common callose. Subsequently, due to the decomposition of the tetrad callose wall, the microspores are separated and form the pollen grains<sup>24</sup>. In orchids, with the exception of *Apostasia* and *Neuwiedia*, the pollen callose wall is not decomposed, leading to the formation of a tetrad of pollen grains as a unit, and these ‘sticky balls’ together form the pollinium<sup>24, 25</sup>. Because the P-subclade genes have been lost in most orchids but not in *A. shenzhenica* and because their presence seems to correlate with the presence of a pollinium, we propose that the P-subclade genes provide the ability to decompose the callose wall and that their loss leads to the production of pollen that aggregate into pollinia (**Figure 4a, c**), which however will need to be confirmed with experimental data. The formation of pollinia has been an important transition during the evolution of orchids. This transition, combined with the evolution and formation of the flower lip and gynostemium, has proven very useful for efficient insect pollination and likely lead to the emergence of reproductive barriers<sup>15</sup>.

## Supplementary Figures

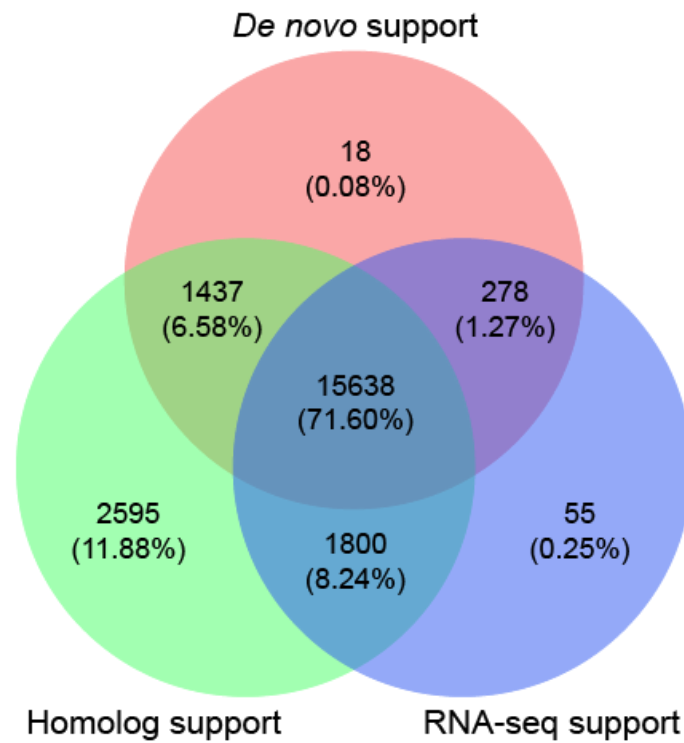

**Supplementary Figure 1 | Evidence for gene annotation of *A. shenzhenica*.** The respective support of final gene sets by the three methods (*De novo* prediction, Homology searching and RNA-seq mapping) are shown.

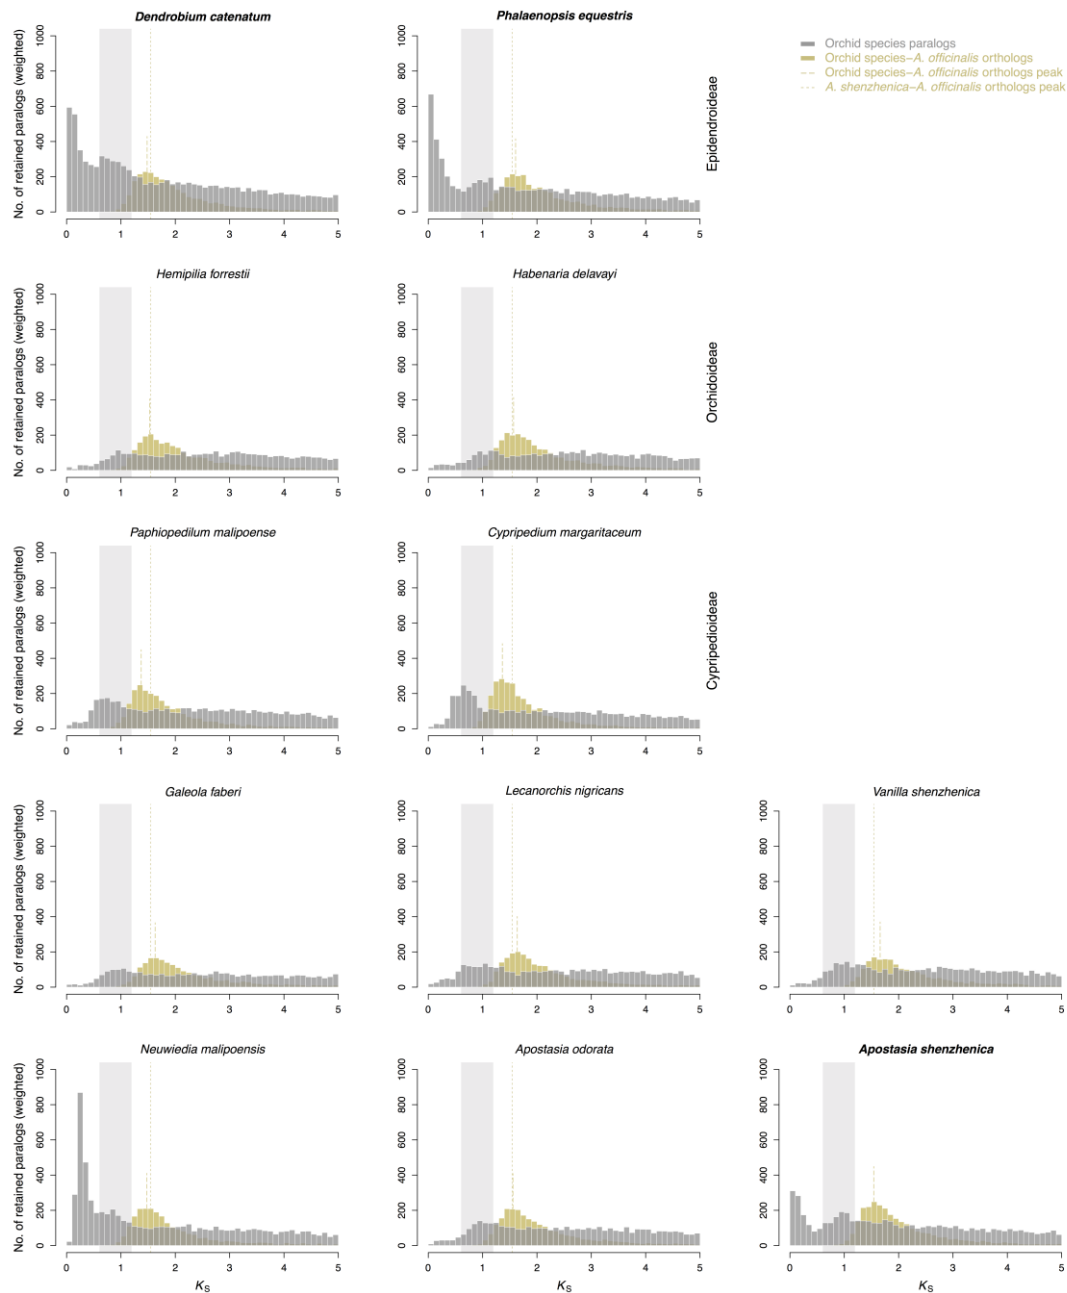

**Supplementary Figure 2 | Distribution of synonymous substitutions per synonymous site ( $K_S$ ) of the whole paranome for three orchid genomes and nine orchid transcriptomes.**  $K_S$  distributions of paralogs are shown in gray. The light gray rectangle in the background of each plot highlights the  $K_S$  range from 0.6–1.2 in which putative WGD peaks can be identified for all 12 orchid species shown.  $K_S$  distributions of one-to-one orthologues between each orchid species and *A. officinalis*, representing their time of divergence, are shown in yellow, with long-dashed lines indicating the peak (based on KDE) of the distributions. The  $K_S$  value of the peak of

the *A. shenzhenica*–*A. officinalis* one-to-one orthologue distribution is shown for comparison as a dashed line in each plot, indicating potential differences in substitution rates compared to *A. shenzhenica*. The three orchids with genomes are in bold.



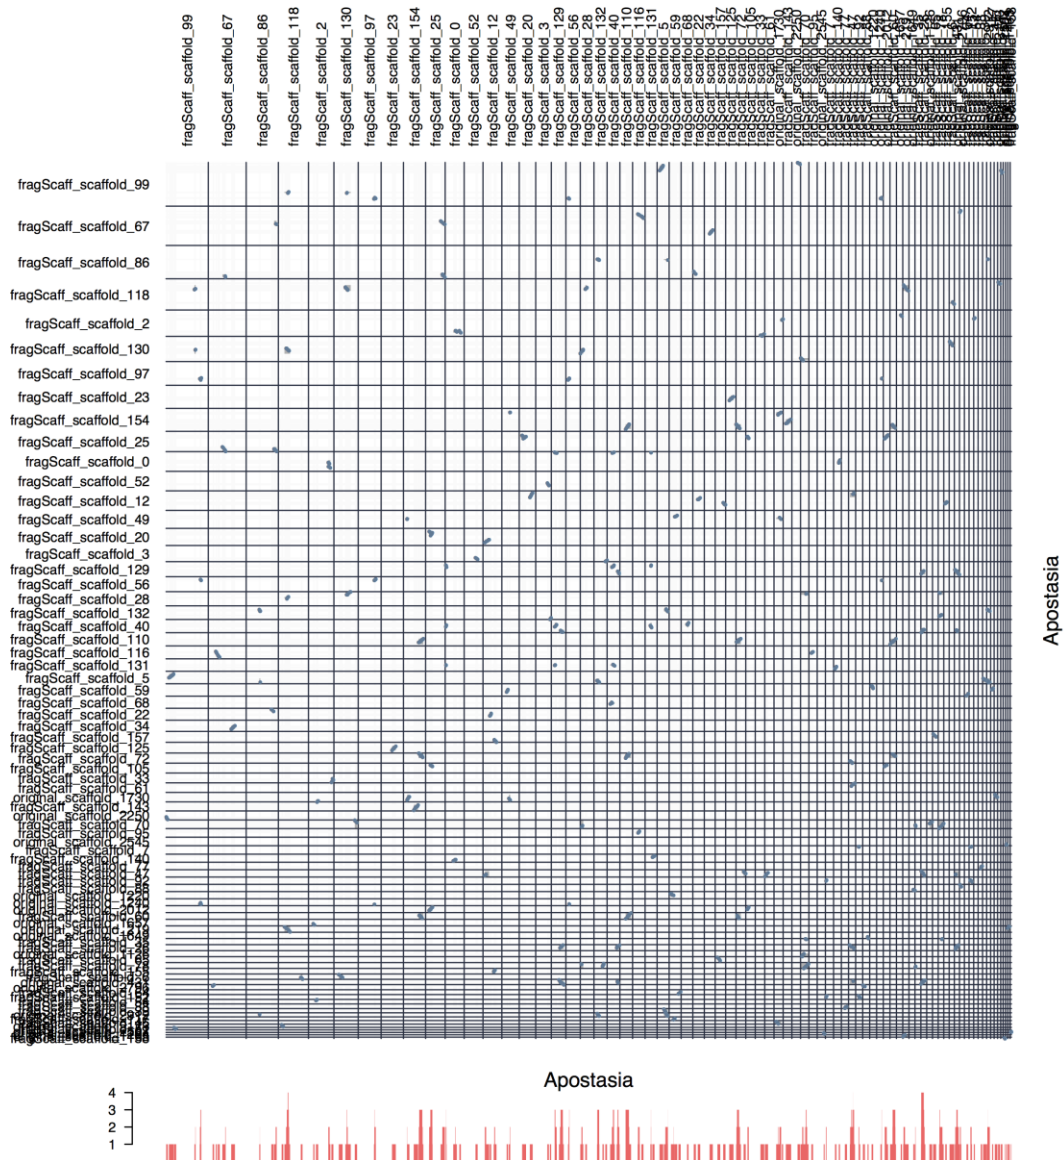

**Supplementary Figure 3 | ‘Synteny’ dot plot of the self-comparison of *A. shenzhenica*.** Only co-linear segments with at least 5 anchor pairs are shown. The red bars below the dot plot illustrate the duplication depths (the number of connected co-linear segments overlapping at each scaffold/chromosomal position; see **Methods**).

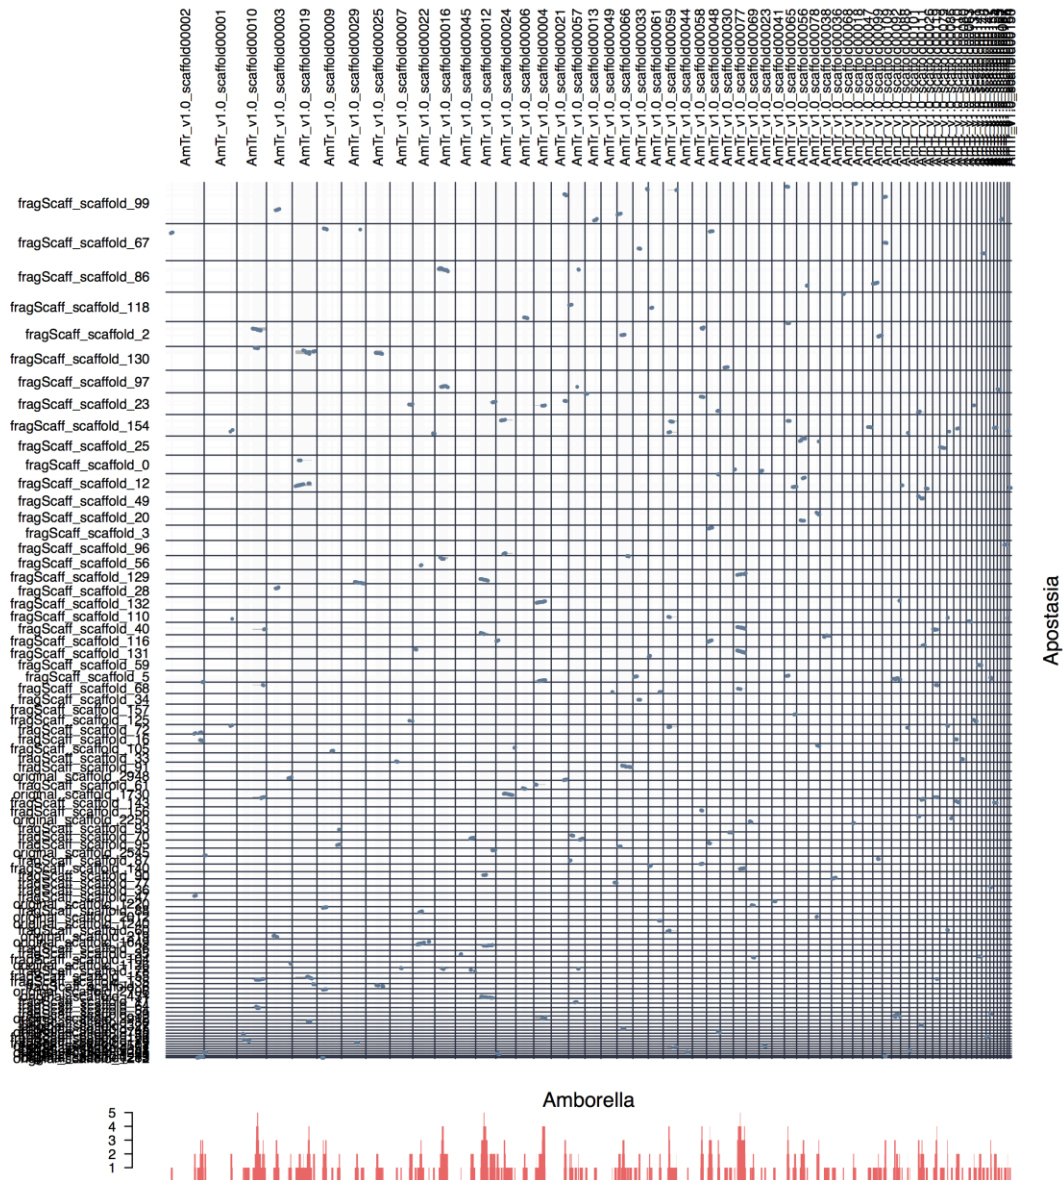

**Supplementary Figure 4 | ‘Synteny’ dot plot of the comparison between *A. shenzhenica* and *A. trichopoda*.** Only co-linear segments with at least 5 anchor pairs are shown. The red bars below the dot plot illustrate the duplication depths (the number of connected co-linear segments overlapping at each scaffold/chromosomal position; see **Methods**).



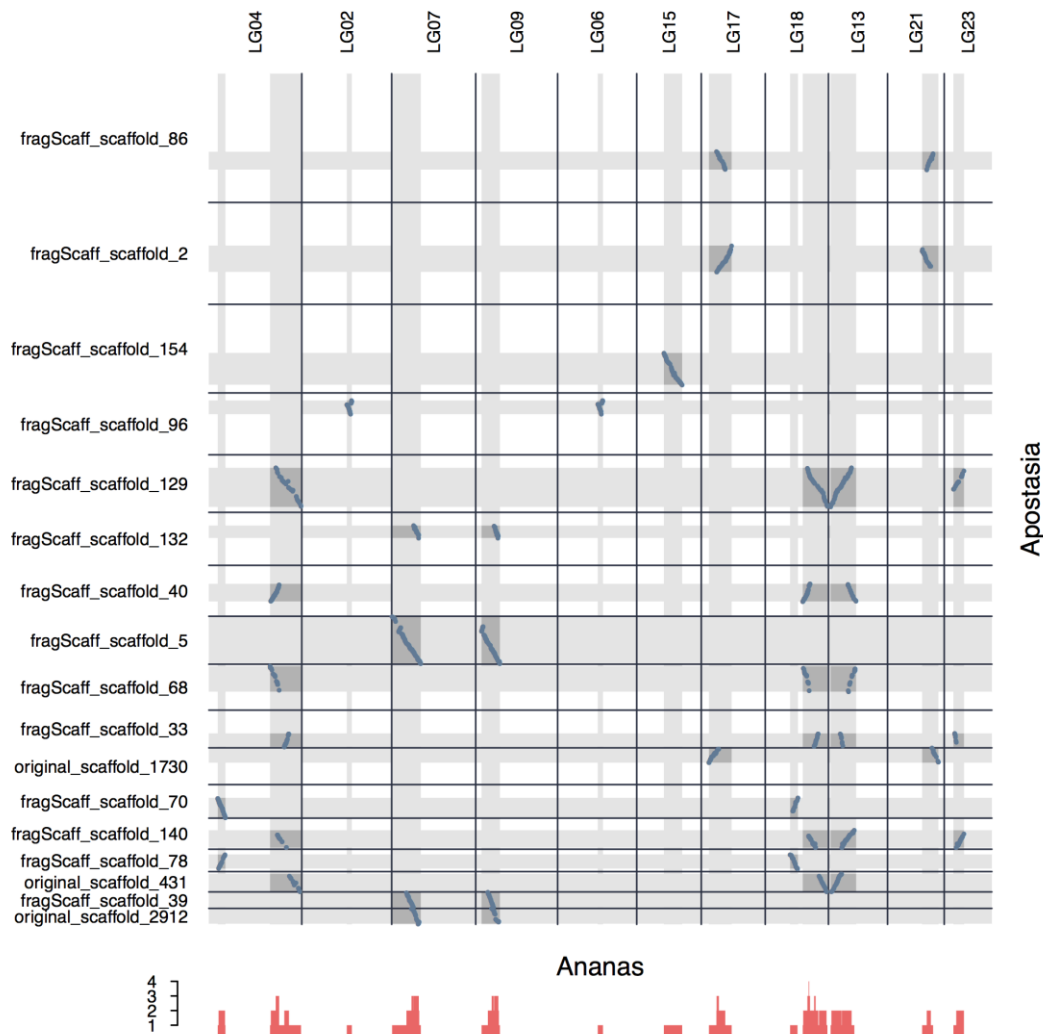

**Supplementary Figure 6 | ‘Synteny’ dot plot of the comparison between *A. shenzhenica* and *A. comosus*.** Only co-linear segments with at least 30 anchor pairs are shown. The sections on each scaffold with co-linear segments between are shown in grey. The red bars below the dot plot illustrate the duplication depths (the number of connected co-linear segments overlapping at each scaffold/chromosomal position; see **Methods**). Only connected co-linear segments with at least 15 anchor pairs were used to calculate the duplication depths.

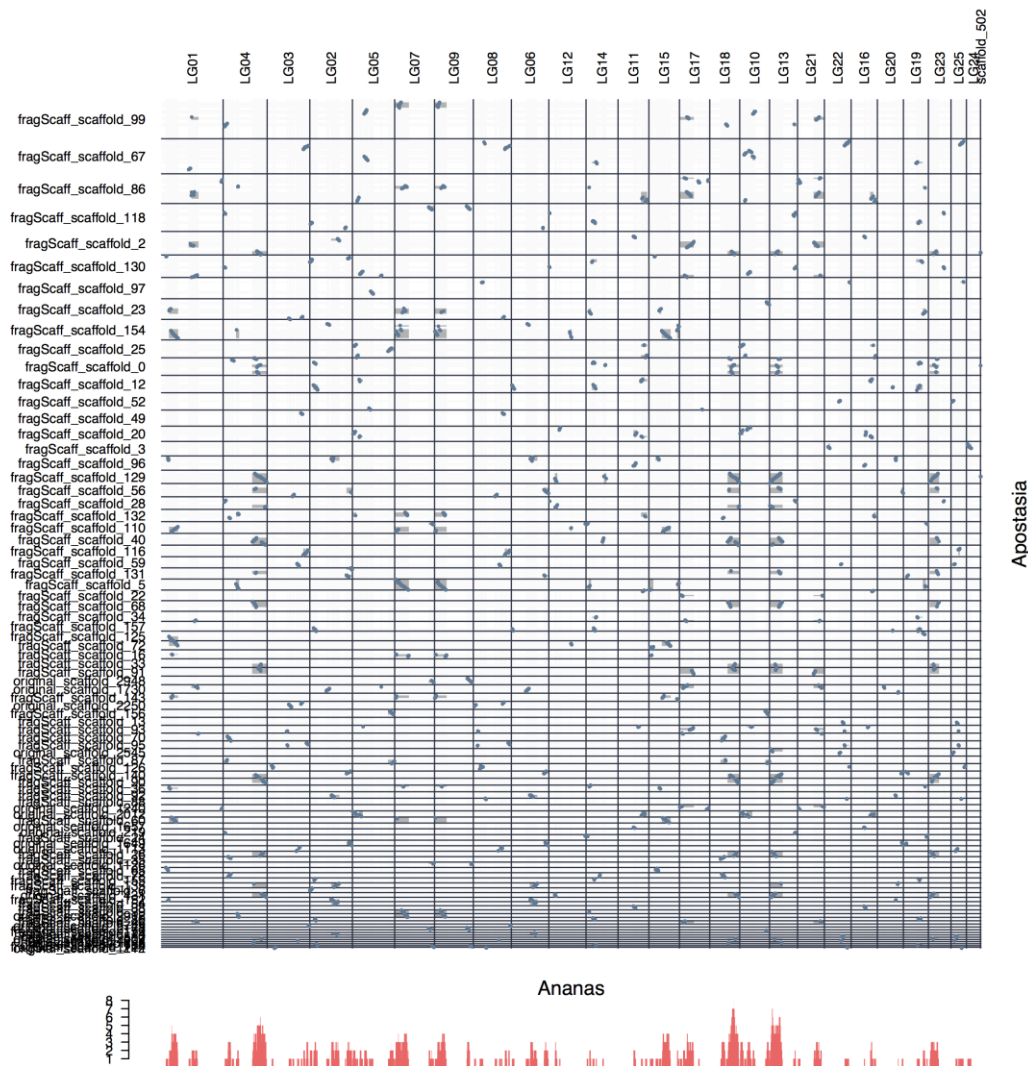

**Supplementary Figure 7 | ‘Synteny’ dot plot of the comparison between *A. shenzhenica* and *A. comosus*.** Only co-linear segments with at least 10 anchor pairs are shown. The sections on each scaffold with co-linear segments between are shown in grey. The red bars below the dot plot illustrate the duplication depths (the number of connected co-linear segments overlapping at each scaffold/chromosomal position; see **Methods**). Only connected co-linear segments with at least 10 anchor pairs were used to calculate the duplication depths.

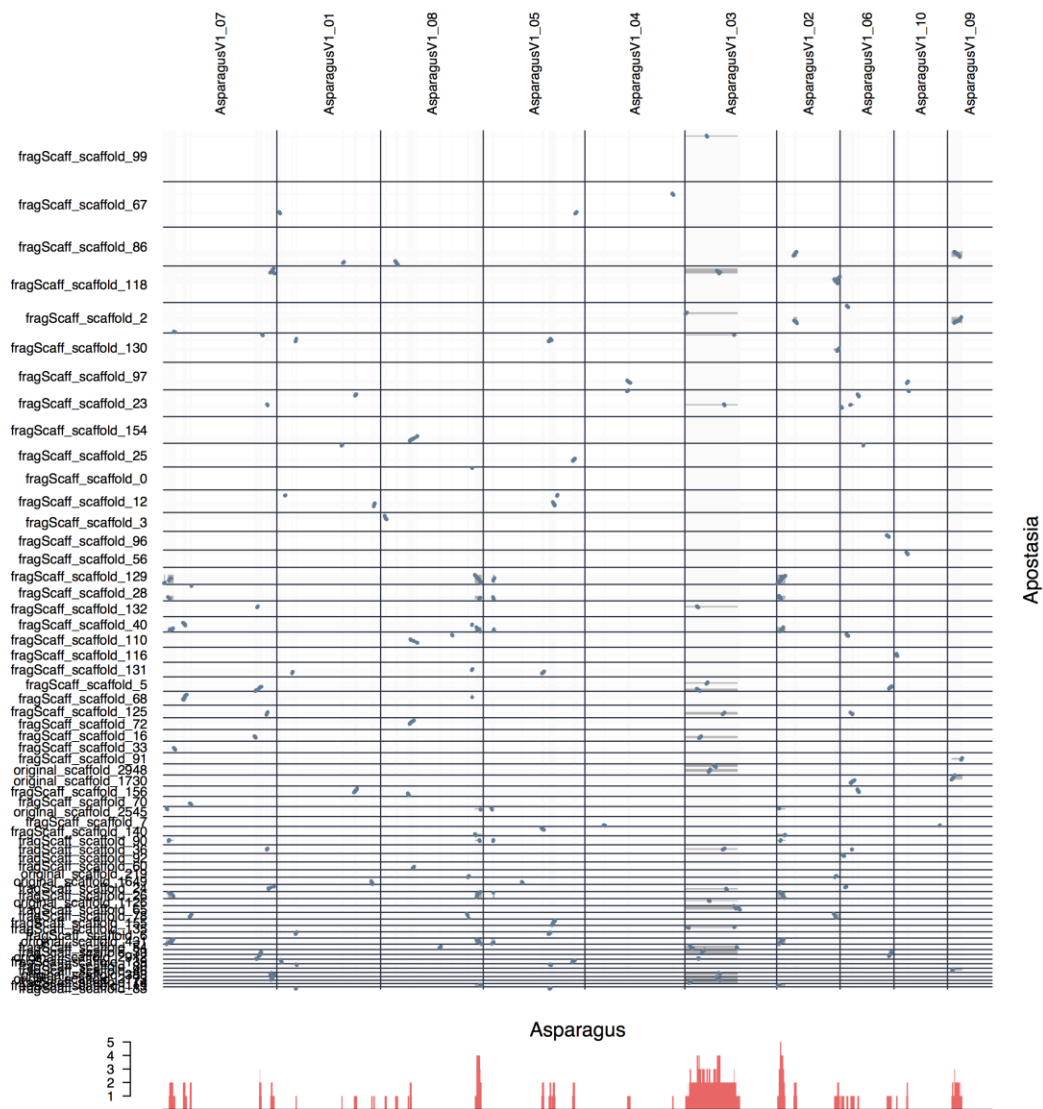

**Supplementary Figure 8 | ‘Synteny’ dot plot of the comparison between *A. shenzhenica* and *A. officinalis*.** Only co-linear segments with at least 10 anchor pairs are shown. The sections on each scaffold with co-linear segments between are shown in grey. The red bars below the dot plot illustrate the duplication depths (the number of connected co-linear segments overlapping at each scaffold/chromosomal position; see **Methods**). Only connected co-linear segments with at least 10 anchor pairs were used to calculate the duplication depths.

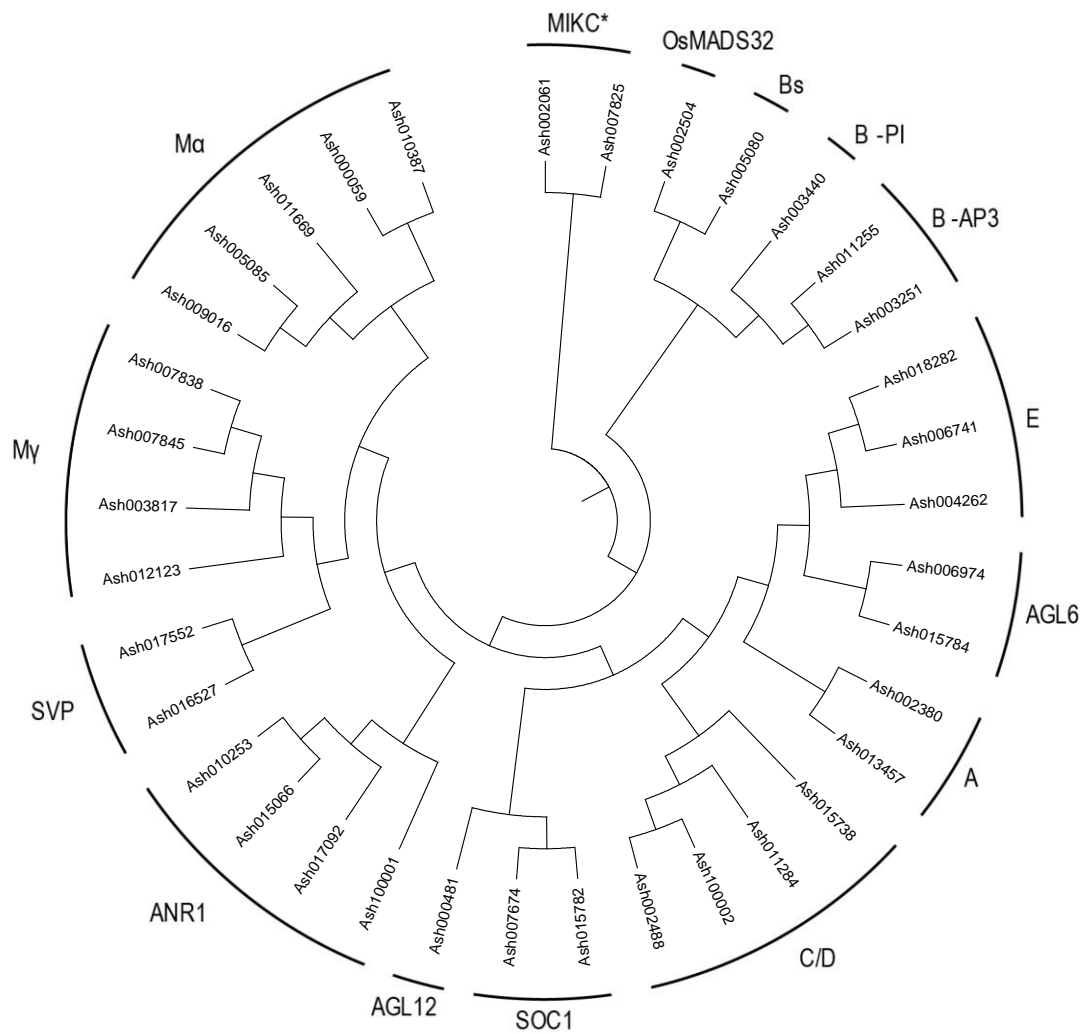

**Supplementary Figure 9 | The MADS-box genes involved in orchid morphological evolution. MADS-box genes in *A. shenzhenica*, which contains 36 putative functioning MADS-box genes belonging to 15 subfamilies.**

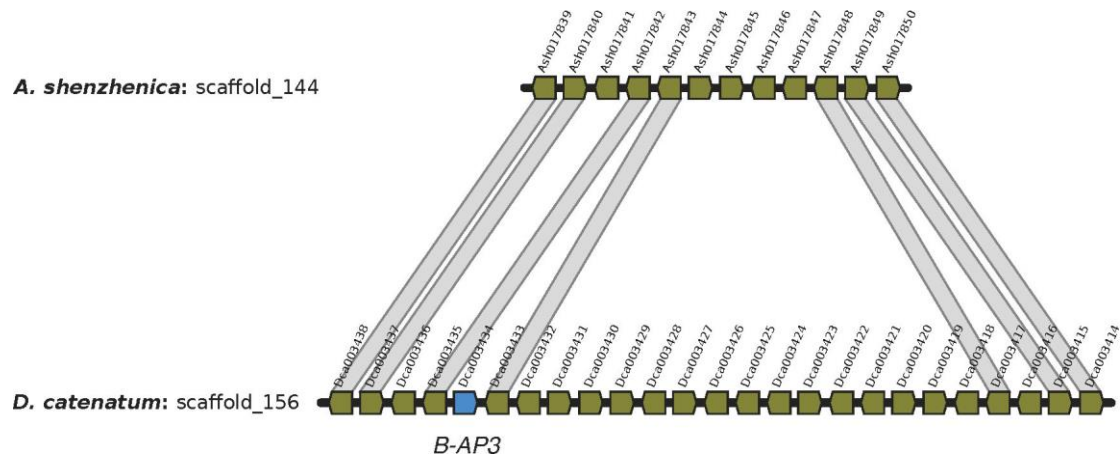

**Supplementary Figure 10 | One co-linear segment between *A. shenzhenica* and *D. catenatum* showing a loss of a *B-AP3* gene in *A. shenzhenica*.** The co-linearity between the two species was identified by i-ADHoRe (v3.0) using homologous pairs aligned by BLASTP ( $E$  value  $< 1 \times 10^{-5}$  and c-score  $\geq 0.5$ ). Arrowed blocks indicate genes with orientations, and grey lines connect homologues in the co-linear region. Two genes that are on both sides of one *B-AP3* gene (blue) in *D. catenatum* have two corresponding homologues that remain in the same order in *A. shenzhenica* but without any gene in between, suggesting the *B-AP3* gene got lost in *A. shenzhenica*.



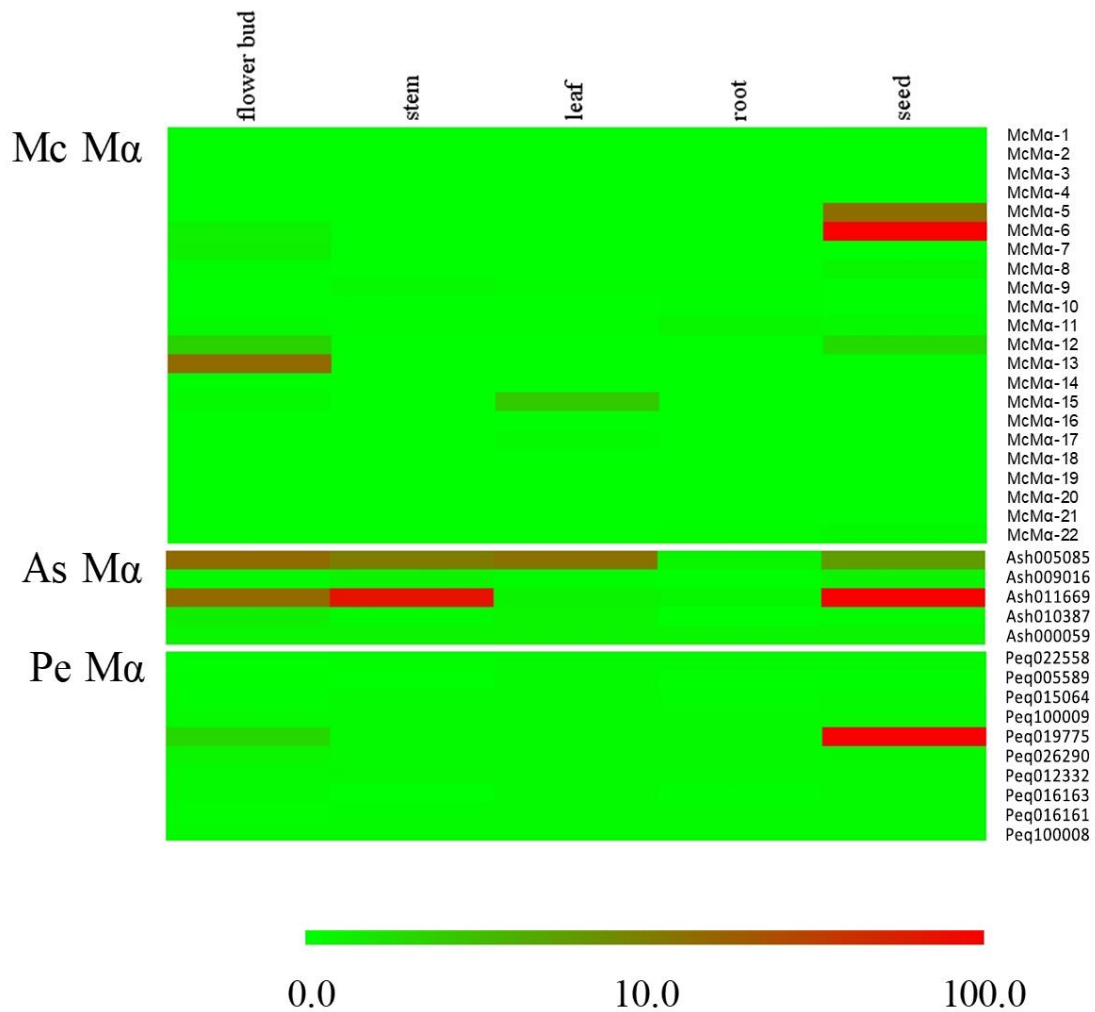

**Supplementary Figure 11 | Expression of type I Ma MADS-box genes in *M. capitulata*, *A. shenzhenica* and *P. equestris*.** As: *A. shenzhenica*; Mc: *M. capitulata*; Pe: *P. equestris*. The expression levels (FPKM value) are represented by the color bar.



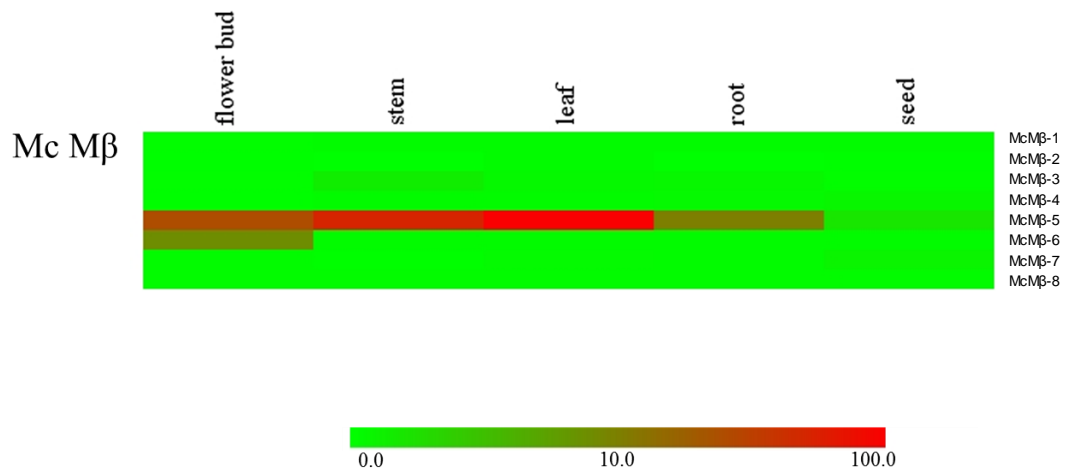

**Supplementary Figure 13 | Expression of type I M $\beta$  MADS-box genes in *M. capitulata*.** The expression levels (FPKM value) are represented by the color bar.

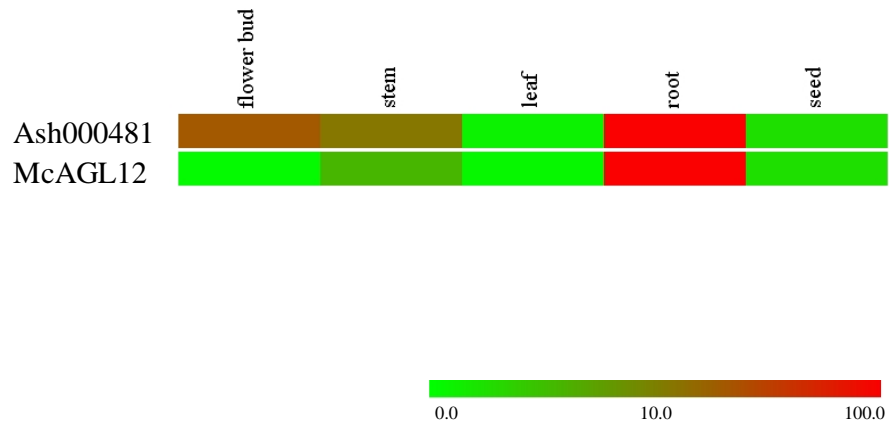

**Supplementary Figure 14 | Expression level of *A. shenzhenica* and *M. capitulata* *AGL12* genes.** *Arabidopsis AGL12* is involved in root cell differentiation and in flowering transition<sup>26</sup>. The expression levels (FPKM value) are represented by the color bar.

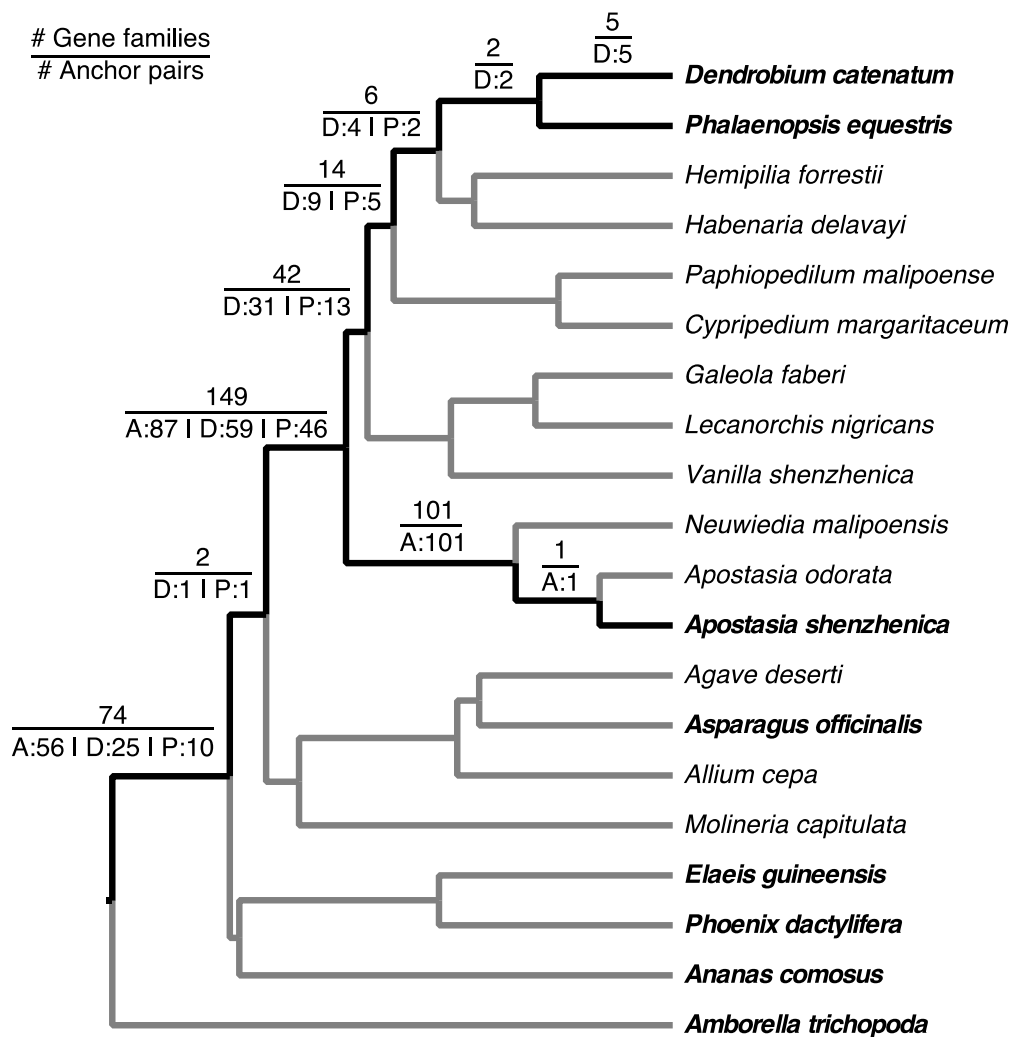

**Supplementary Figure 15 | Phylogenomic analysis of orchid WGD events.** The numbers on the branches of the species tree indicate the number of gene families that had one or more anchor pairs (duplicated genes found in co-linear regions) from at least one of the three orchids with genomes that coalesced on the respective branch (top), as well as the individual contributions of anchor pairs from the three orchids (bottom; A: *A. shenzhenica*; D: *D. catenatum*; and P: *P. equestris*). All the duplication events have bootstrap values over 50%.

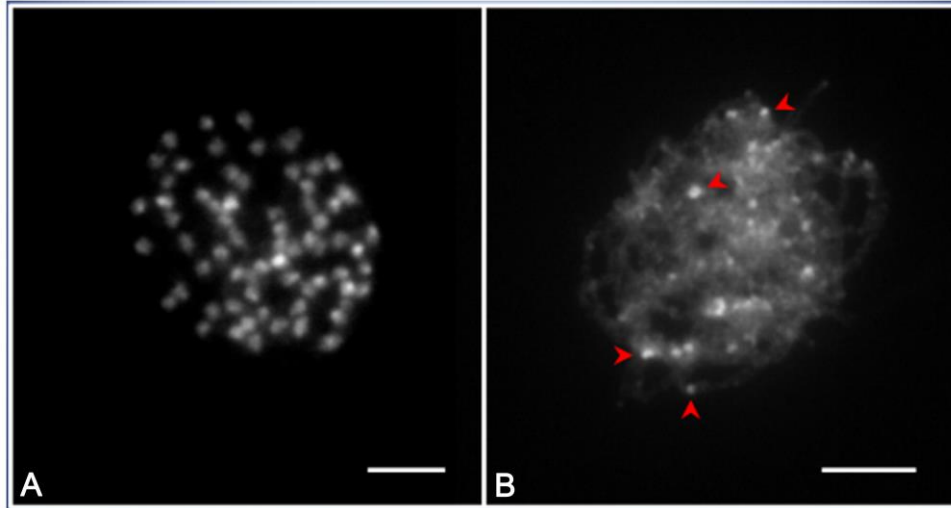

**Supplementary Figure 16 | Fluorescent dye (DAPI)-stained chromosomal complements.** *A. shenzhenica* presents 68 mitotic metaphase chromosomes in a root cell (A) and shows euchromatin with a few scattered heterochromatin spots (some of these are indicated by the red arrowheads) in a cell at the meiotic pachytene stage (B). The bars represent 5  $\mu\text{m}$ .

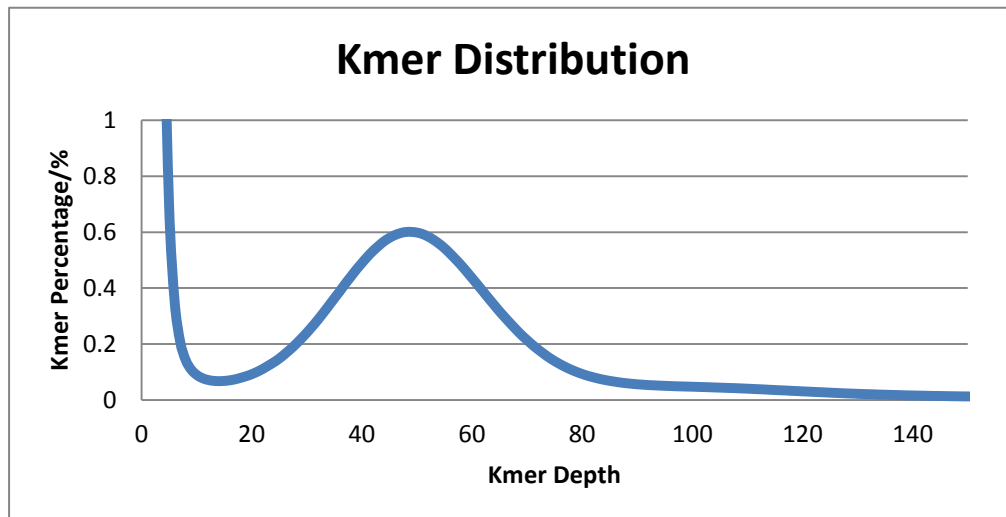

**Supplementary Figure 17 | *K-mer* distribution of sequencing reads.** According to the distribution, we estimate that the genome size of *A. shenzhenica* is approximately 471 Mb. The analysis is based on the Illumina data.

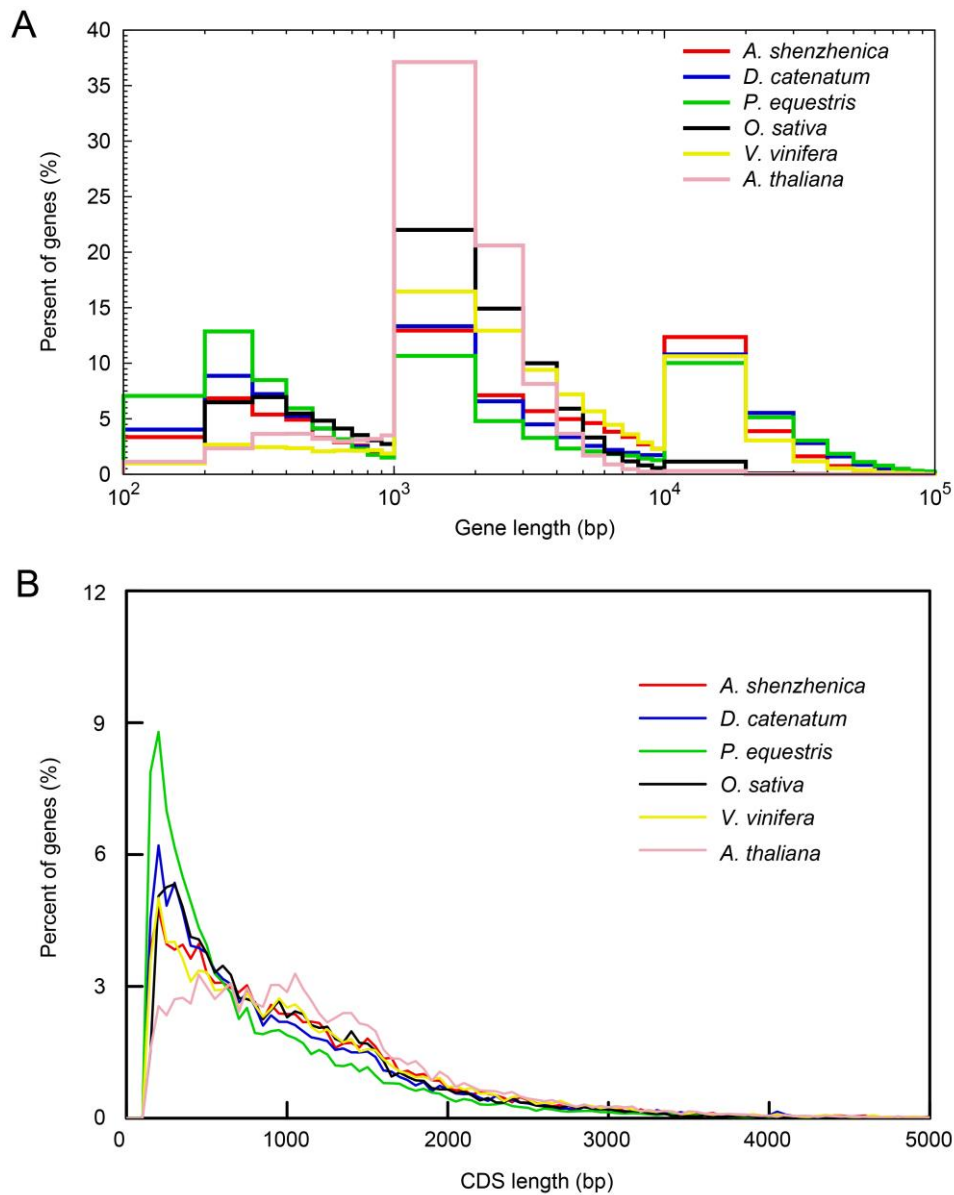

**Supplementary Figure 18 | Distribution of gene length (A) and CDS length (B) for six plants.**



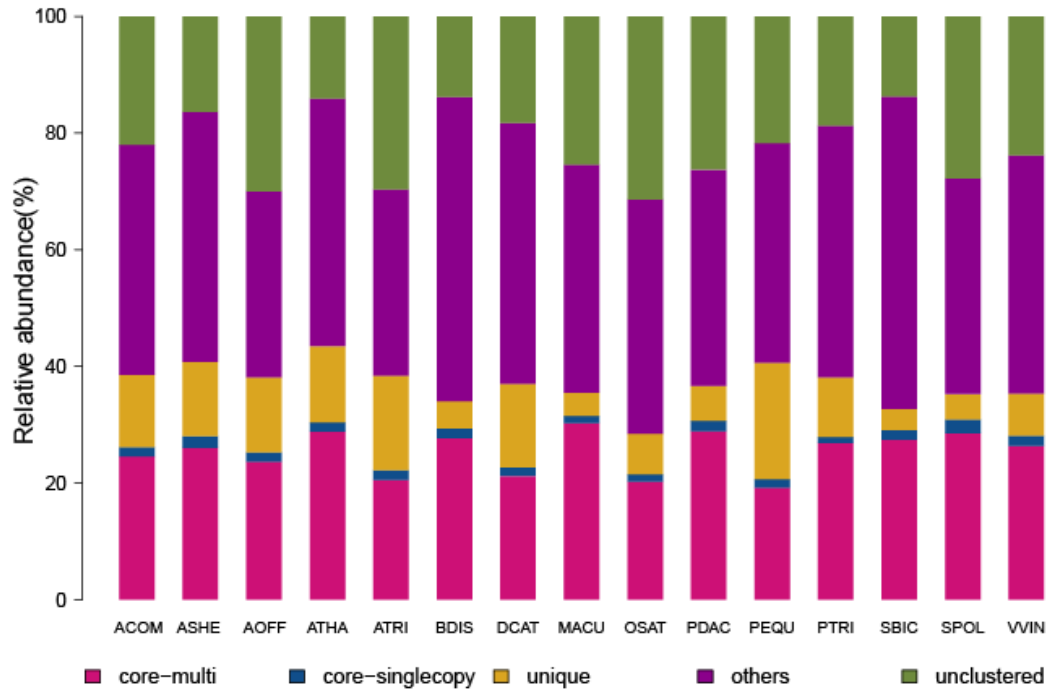

### Supplementary Figure 19 | Orthologous genes found in different plant species.

**Core-multi:** genes have orthologues in all other species and might have paralogues in species within one family. **Core-single copy:** genes have orthologues in all other species and no other paralogues in this species within one family. **Unique:** genes for which only one family contains genes of this species. **Other orthologues:** genes are not included in the other mentioned categories. **Unclustered genes:** genes that are unclustered into any family. ACOM, *A. comosus*; AOFF, *A. officinalis*; ASHE, *A. shenzhenica*; ATHA, *A. thaliana*; ATRI, *A. trichopoda*; BDIS, *B. distachyon*; DCAT, *D. catenatum*; MACU, *M. acuminata*; OSAT, *O. sativa*; PDAC, *P. dactylifera*; PEQU, *P. equestris*; PTRI, *P. trichocarpa*; SBIC, *S. bicolor*; SPOL, *S. polyrrhiza*; VVIN, *V. vinifera*.

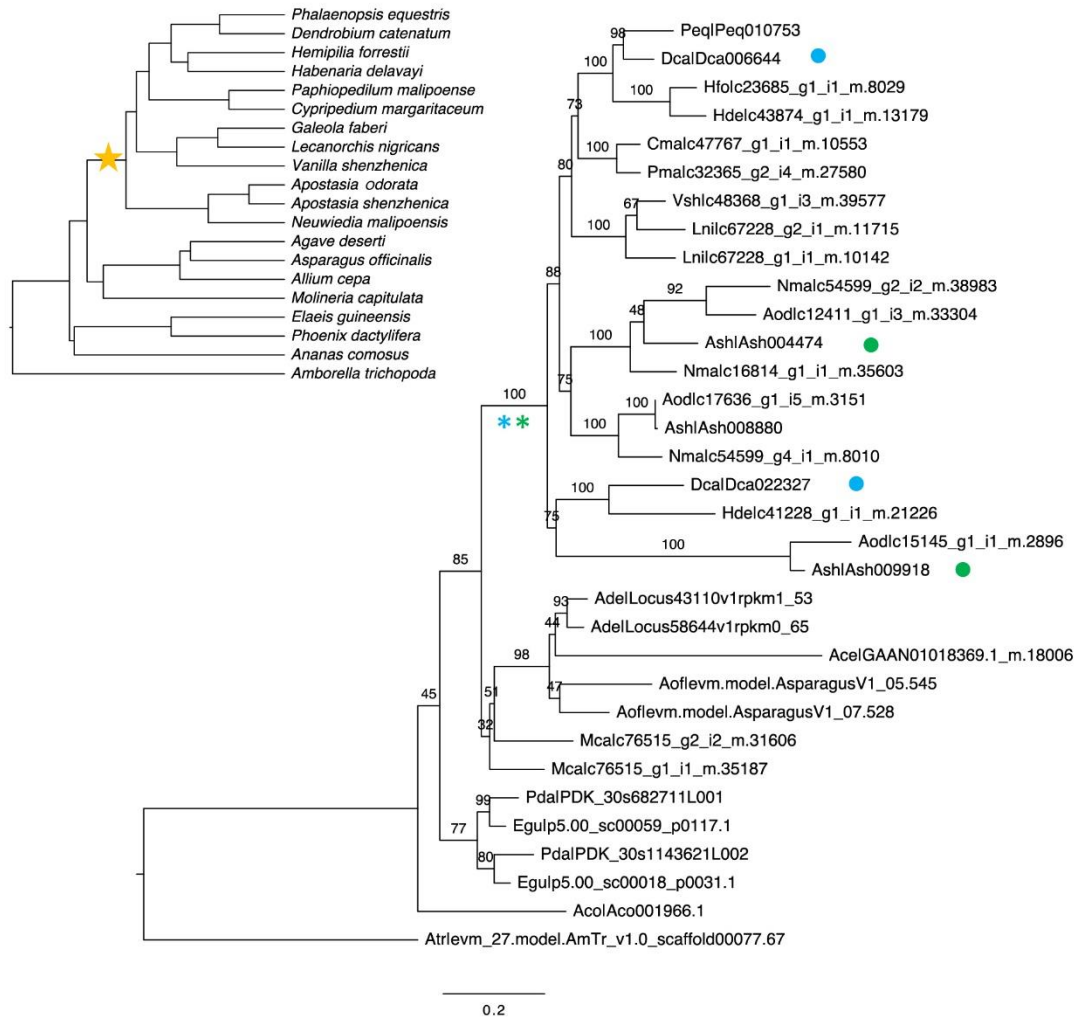

**Supplementary Figure 20 | Example of coalescence points of anchor pairs mapped onto the species phylogeny.** The blue and green dots in the gene tree (right) denote pairs of duplicated anchor genes from *D. catenatum* and *A. shenzhenica*, respectively. Both anchor pairs coalesce onto the same node (blue and green asterisks), which corresponds to a putative WGD event on the stem branch of the orchids in the species tree (left, yellow stars). Although two anchor pairs were found here, we count the gene family only once as support for a shared WGD event in orchids in **Figure 3** and **Supplementary Figure 14** because the anchor pairs are from different species and support the same single event. The numbers on the gene tree branches are bootstrap values (%). For gene names, the first three letters denote species: Ace, *A. cepa*; Aco, *A. comosus*; Ade, *A. deserti*; Aod, *A. odorata*; Aof, *A. officinalis*; Ash, *A. shenzhenica*; Atr, *A. trichopoda*; Cma, *C. margaritaceum*; Dca, *D. catenatum*; Egu,

*E. guineensis*; Gfa: *G. faberi*; Hde, *H. delavayi*; Hfo, *H. forrestii*; Lni, *L. nigricans*;  
Mca, *M. capitulata*; Nma, *N. malipoensis*; Pda, *P. dactylifera*; Peq, *P. equestris*; Pma,  
*P. malipoense*; Vsh, *V. shenzhenica*.

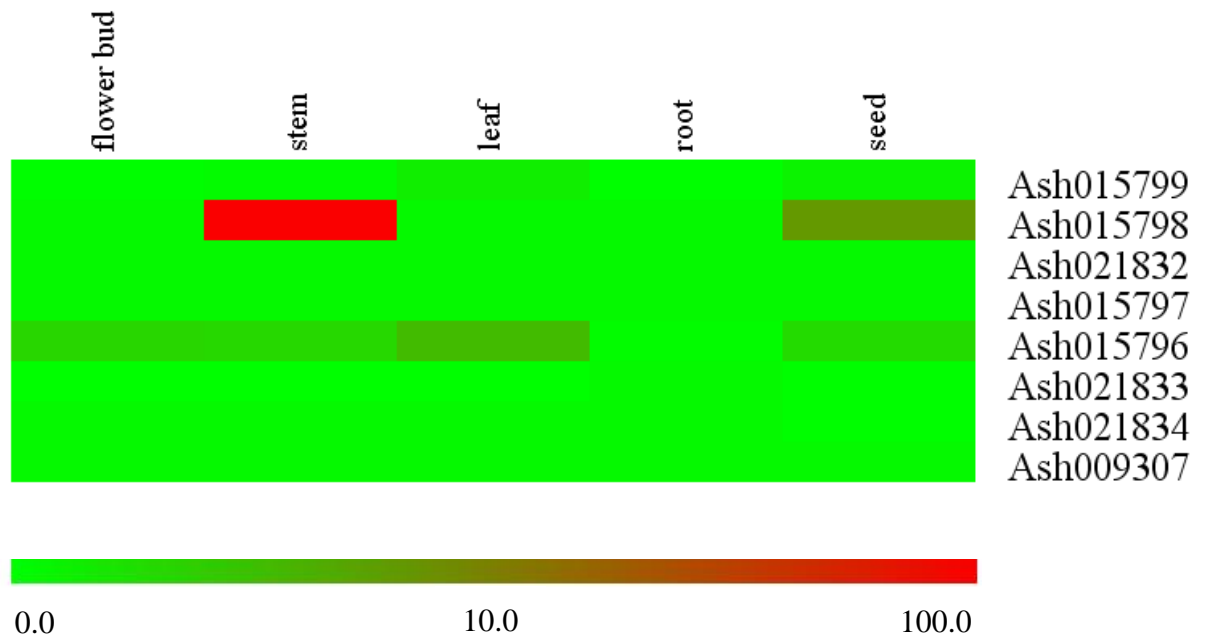

**Supplementary Figure 21 | Expression of *A. shenzhenica* genes with O-methyltransferase activity.** The expression levels (FPKM value) are represented by the color bar.

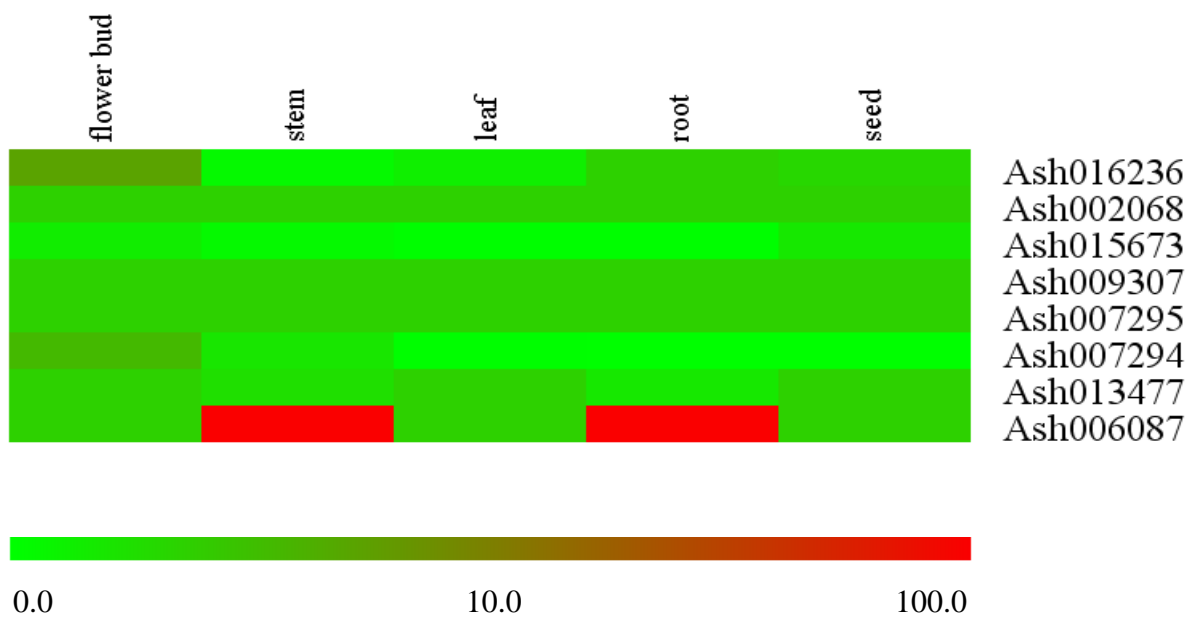

**Supplementary Figure 22 | Expression of *A. shenzhenica* genes involved in flavone and flavonol biosynthesis.** The expression levels (FPKM value) are represented by the color bar.

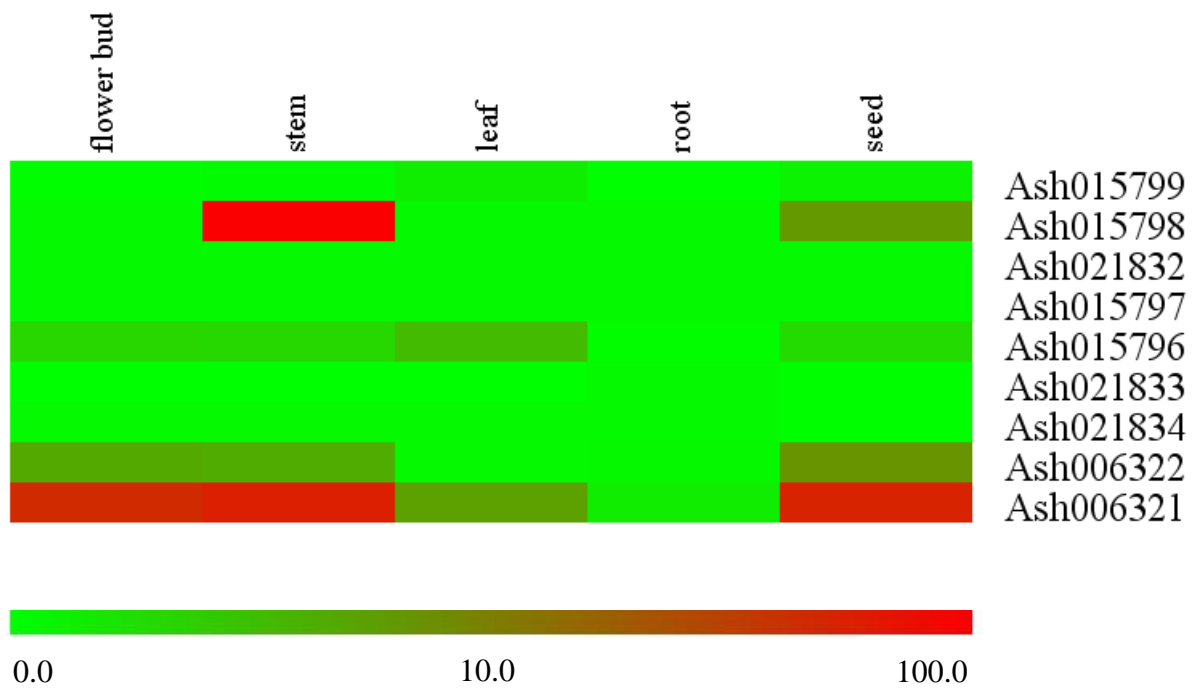

**Supplementary Figure 23 | Expression of *A. shenzhenica* genes involved in biosynthesis of stilbenoids, diarylheptanoids, and gingerol.** The expression levels (FPKM value) are represented by the color bar.

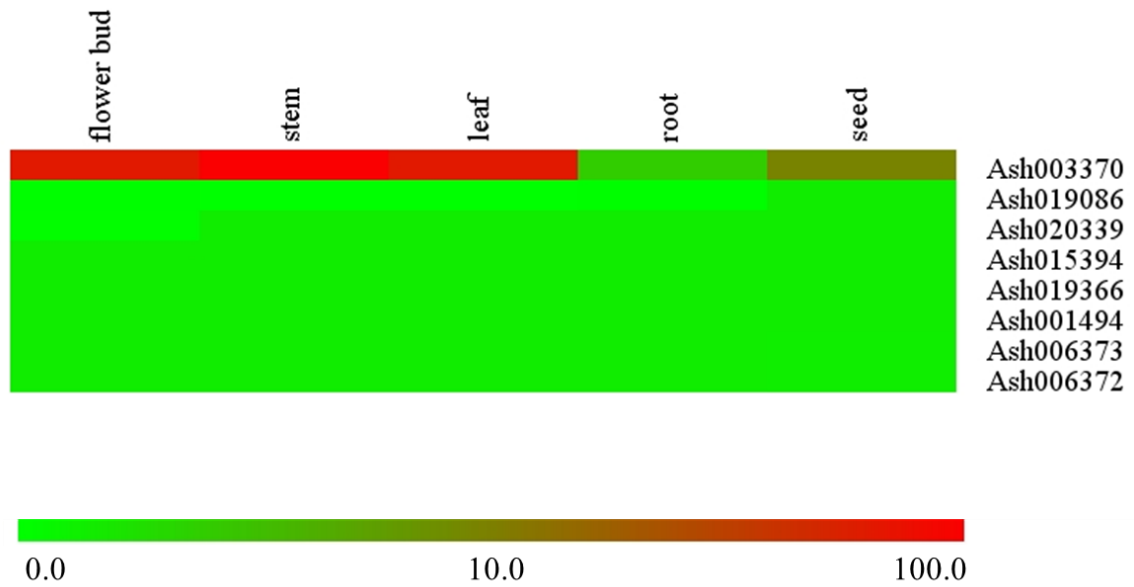

**Supplementary Figure 24 | Expression of *A. shenzhenica* cysteine-type peptidase genes.** The expression levels (FPKM value) are represented by the color bar.

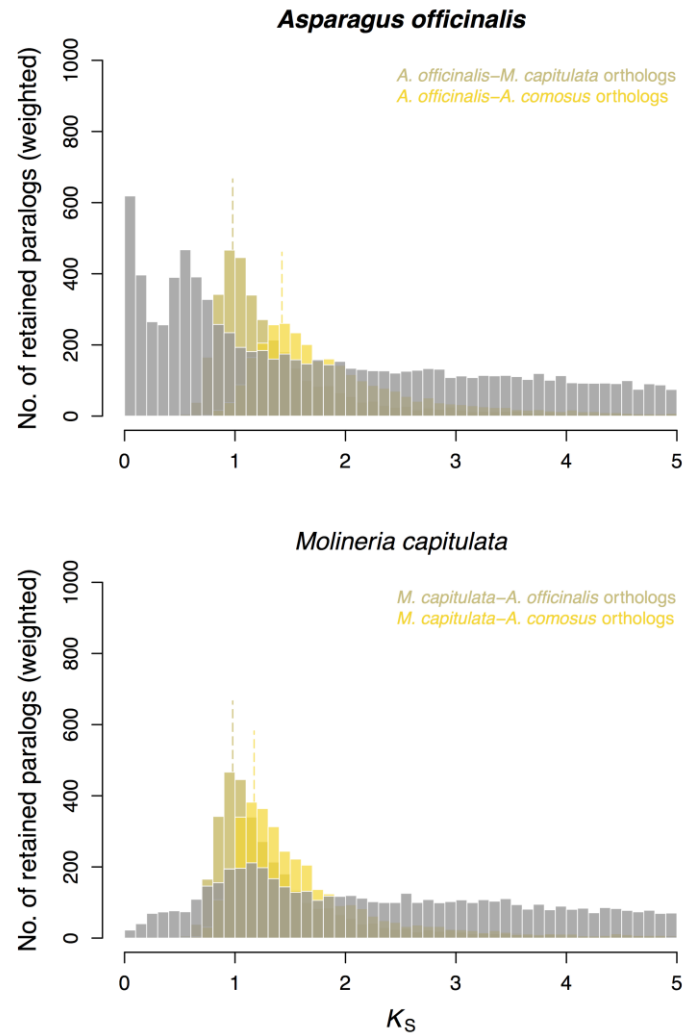

**Supplementary Figure 25 | Distribution of synonymous substitutions per synonymous site ( $K_S$ ) of the whole paralogome for the *A. officinalis* genome and the *M. capitulata* transcriptome.**  $K_S$  distributions of paralogues are shown in gray.  $K_S$  distributions of one-to-one orthologues between *A. officinalis* and *M. capitulata*, and between each of these and *A. comosus*, representing their respective times of divergence, are shown in light brown and bright yellow, respectively, with long-dashed lines indicating the peaks (based on KDE) of the distributions. The putative WGD evident from the  $K_S$  peak in *A. officinalis* does not seem to be shared with *M. capitulata*. The  $K_S$  peak in *M. capitulata* likely represents a signature of the ancient monocot  $\tau$  WGD event<sup>17,18</sup>, shared with *A. comosus* and all other commelinids as well as Orchidaceae.



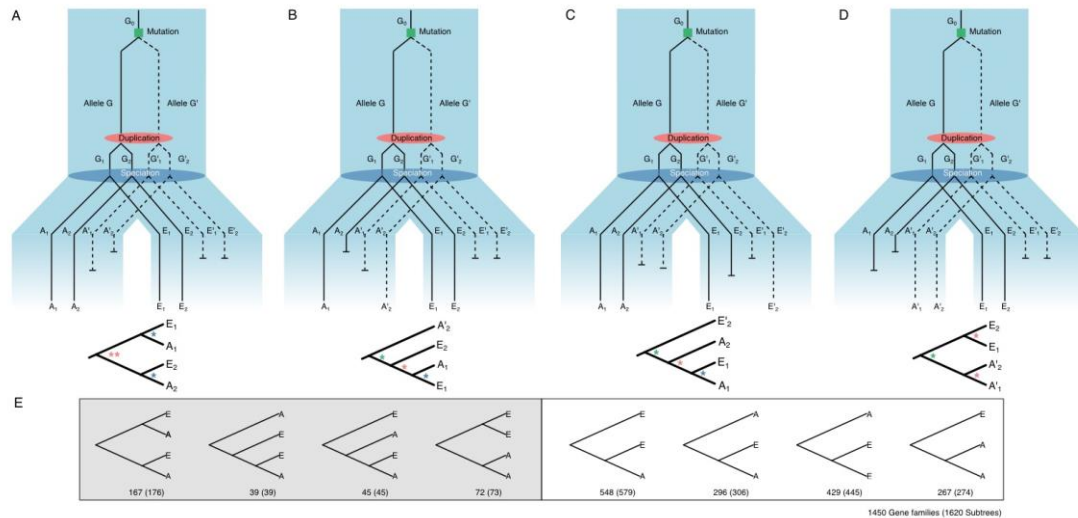

**Supplementary Figure 26 | Incomplete lineage sorting underlying the gene tree discordance owing to short time intervals between the orchid-specific WGD and speciation.** (A)–(D) Four possible scenarios illustrating fixation of different alleles at two paralogous loci resulting from a duplication event that occurred shortly before a speciation event (see **Supplementary Note 2.3** for details). The possible resulting gene trees are shown below for each scenario with asterisks denoting possible phylogenetic events that branch the gene trees. The colors of the asterisks indicate different phylogenetic events, with blue, red and green, for speciation, duplication and mutation/allele divergence, respectively. (E) The gene trees on the left highlighted in grey are topologies that would be expected without gene loss for each scenario above; the gene trees on the right show the expected topologies including loss or incomplete sampling of one gene. The numbers below the topologies show support from phylogenomic analysis including the three orchids, plus *A. officinalis* and *A. trichopoda* based on full gene trees found and contained subtrees (in parentheses), see **Supplementary Figure 26**. A, *A. shenzhenica*; E, Epidendroideae (including *D. catenatum* and *P. equestris*).

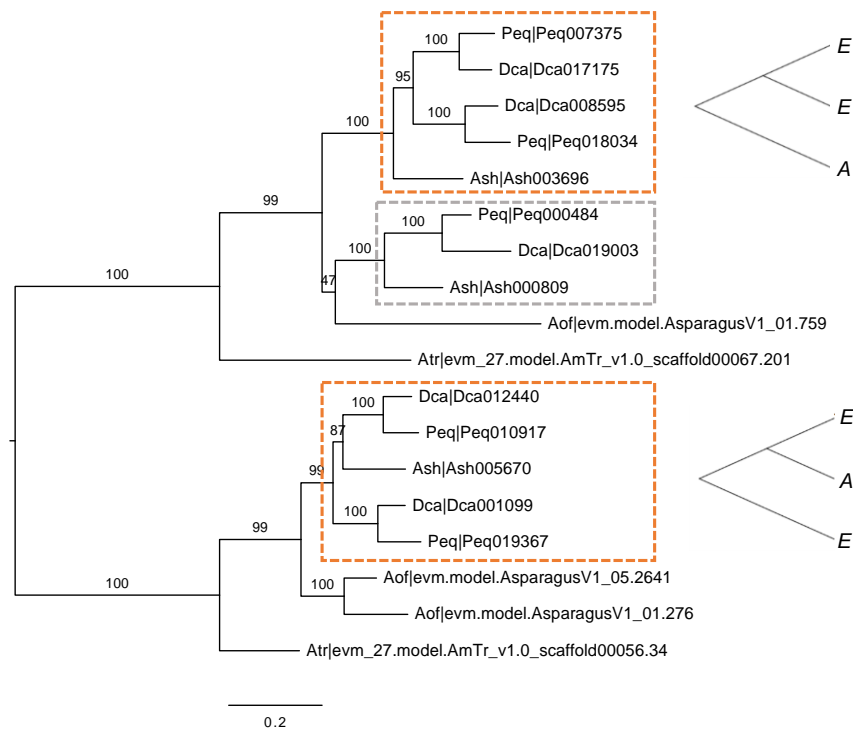

### Supplementary Figure 27 | Example of the analysis of gene (sub)tree topologies.

Full gene family tree with three subtrees (clades) highlighted; the highlighted subtrees each only contain genes from the three orchids (dashed rectangles). Only two of the subtrees (orange rectangles) show duplication events; one supports an independent duplication in Epidendroideae (top), and the other supports a shared duplication in orchids (bottom). The numbers on the gene tree branches are bootstrap values (%). For gene names, the first three letters denote species: Ash, *A. shenzhenica*; Atr, *A. trichopoda*; Dca, *D. catenatum*; Aof, *A. officinalis*; Peq, *P. equestris*. In the two simplified topologies, A indicates *A. shenzhenica*; E, Epidendroideae (including *D. catenatum* and *P. equestris*).

## Supplementary Tables

### Supplementary Table 1 | Summary of the *A. shenzhenica* genome sequencing data derived from the Illumina technology.

| Insert size(bp) | Read length(bp) | Number of reads | Total data(Gb) | Sequence depth(X) |
|-----------------|-----------------|-----------------|----------------|-------------------|
| 180             | 90              | 168,223,606     | 15.14          | 34.97             |
| 500             | 100             | 275,127,442     | 27.51          | 63.54             |
| 800             | 90              | 98,419,616      | 8.86           | 20.46             |
| 2000            | 90              | 91,713,060      | 8.25           | 19.06             |
| 5000            | 90              | 119,967,670     | 10.80          | 24.94             |
| 10000           | 90              | 46,631,366      | 4.20           | 9.69              |
| 20000           | 125             | 58,492,233      | 5.26           | 12.23             |

**Supplementary Table 2 | Summary of the 3<sup>rd</sup> generation sequencing derived from the PacBio RS II.**

| <b>Species</b>        | <b>Number of bases</b> | <b>Number of reads</b> | <b>Mean read length (bp)</b> |
|-----------------------|------------------------|------------------------|------------------------------|
| <i>A. shenzhenica</i> | 5,441,238,461          | 1,352,628              | 4,023                        |
| <i>D. catenatum</i>   | 11,060,594,629         | 1,502,920              | 7,359                        |
| <i>P. equestris</i>   | 10,539,372,308         | 1,352,628              | 7,792                        |

**Supplementary Table 3 | Summary of the 10X genomics Linked-Reads sequencing derived from the Illumina technology.**

| <b>Species</b>        | <b>Read length (bp)</b> | <b>Raw paired reads</b> | <b>Raw bases</b> | <b>Filtered paired reads</b> | <b>Filtered bases</b> |
|-----------------------|-------------------------|-------------------------|------------------|------------------------------|-----------------------|
| <i>A. shenzhenica</i> | 150                     | 369,749,121             | 110,924,736,300  | 318,763,894                  | 95,629,168,200        |
| <i>D. catenatum</i>   | 150                     | 415,271,158             | 124,581,347,400  | 387,320,106                  | 116,196,031,800       |
| <i>P. equestris</i>   | 150                     | 411,429,315             | 123,428,794,500  | 383,649,995                  | 115,094,998,500       |

**Supplementary Table 4 | Summary of the *A. shenzhenica* genome assembled by Illumina, PacBio and 10X genomics technologies.**

|                     | Scaffold    |        | Contig      |        |
|---------------------|-------------|--------|-------------|--------|
|                     | Length(bp)  | Number | Length(bp)  | Number |
| <b>max_len</b>      | 12,424,053  |        | 556,054     |        |
| <b>N10</b>          | 10,110,636  | 4      | 223,148     | 112    |
| <b>N20</b>          | 6,237,011   | 8      | 166,933     | 283    |
| <b>N30</b>          | 5,003,307   | 14     | 130,671     | 503    |
| <b>N40</b>          | 3,457,059   | 22     | 103,308     | 780    |
| <b>N50</b>          | 3,029,156   | 32     | 80,069      | 1,136  |
| <b>N60</b>          | 2,413,737   | 45     | 63,275      | 1,590  |
| <b>N70</b>          | 1,972,814   | 61     | 47,252      | 2,184  |
| <b>N80</b>          | 1,402,703   | 82     | 31,086      | 3,022  |
| <b>N90</b>          | 765,391     | 115    | 15,048      | 4,473  |
| <b>Total_length</b> | 348,734,287 |        | 322,901,144 |        |
| <b>GC_rate</b>      | 31.2%       |        | 33.7%       |        |

**Supplementary Table 5 | Summary of gene annotation of *A. shenzhenica*.**

| Gene set               |                     | Protein coding<br>gene number | Average<br>gene length<br>(bp) | Average<br>CDS length<br>(bp) | Average<br>exon per<br>gene | Average<br>exon<br>length (bp) | Average<br>intron<br>length (bp) |
|------------------------|---------------------|-------------------------------|--------------------------------|-------------------------------|-----------------------------|--------------------------------|----------------------------------|
| <i>De novo</i>         | AUGUSTUS            | 26,015                        | 8771.89                        | 1128.15                       | 4.68                        | 241.14                         | 2078.02                          |
|                        | GlimmerHMM          | 36,406                        | 8249.20                        | 701.52                        | 3.39                        | 207.17                         | 3163.09                          |
| Homolog<br>(exonerate) | <i>A. thaliana</i>  | 19,532                        | 5099.79                        | 904.39                        | 4.02                        | 225.25                         | 1391.48                          |
|                        | <i>O. sativa</i>    | 21,804                        | 4905.70                        | 870.30                        | 3.81                        | 228.44                         | 1436.23                          |
|                        | <i>P. equestris</i> | 28,179                        | 3899.98                        | 775.81                        | 3.35                        | 231.88                         | 1331.82                          |
|                        | <i>S. bicolor</i>   | 20,483                        | 4829.59                        | 881.21                        | 3.93                        | 223.95                         | 1345.31                          |
|                        | <i>Z. mays</i>      | 20,929                        | 4620.41                        | 852.71                        | 3.79                        | 224.79                         | 1348.81                          |
| RNA-seq (Cufflinks)    |                     | 20,202                        | 9588.04                        | 1144.15                       | 4.77                        | 239.67                         | 1471.21                          |
| CEGMA                  |                     | 448                           | 11532.37                       | 1225.80                       | 8.46                        | 144.82                         | 1380.78                          |
| MAKER                  |                     | 23,181                        | 7866.12                        | 994.09                        | 4.08                        | 243.45                         | 1915.22                          |
| Final set              |                     | 21,841                        | 7103.12                        | 1099.99                       | 4.51                        | 244.07                         | 1436.59                          |

**Supplementary Table 6 | The assessment of assembled genomes by BUSCO.**

|                                  | <i>A. shenzhenica</i> |            |          |            | <i>P. equestris</i> |            |          |            | <i>D. catenatum</i> |            |          |            |
|----------------------------------|-----------------------|------------|----------|------------|---------------------|------------|----------|------------|---------------------|------------|----------|------------|
|                                  | Assembly              |            | Gene set |            | Assembly            |            | Gene set |            | Assembly            |            | Gene set |            |
|                                  | Proteins              | Percentage | Proteins | Percentage | Proteins            | Percentage | Proteins | Percentage | Proteins            | Percentage | Proteins | Percentage |
| Complete                         |                       |            |          |            |                     |            |          |            |                     |            |          |            |
| Single-Copy<br>BUSCOs            | 685                   | 71.65%     | 575      | 60.15%     | 676                 | 70.71%     | 553      | 57.85%     | 679                 | 71.02%     | 550      | 57.53%     |
| Complete<br>Duplicated<br>BUSCOs | 210                   | 21.97%     | 304      | 31.8%      | 194                 | 20.29%     | 299      | 31.28%     | 205                 | 21.44%     | 324      | 33.89%     |
| Fragmented<br>BUSCOs             | 20                    | 2.09%      | 38       | 3.97%      | 33                  | 3.45%      | 60       | 6.28%      | 29                  | 3.03%      | 42       | 4.39%      |
| Missing<br>BUSCOs                | 41                    | 4.29%      | 39       | 4.08%      | 53                  | 5.54%      | 44       | 4.60%      | 43                  | 4.50%      | 40       | 4.18%      |
| Total BUSCO<br>groups searched   | 956                   | 100%       | 956      | 100%       | 956                 | 100.00%    | 956      | 100.00%    | 956                 | 100.00%    | 956      | 100.00%    |



**Supplementary Table 7 | Summary of the improved *P. equestris* and *D. catenatum* assemblies.**

|                                       | <i>P. equestris</i> |                             |                | <i>D. catenatum</i> |                             |                |
|---------------------------------------|---------------------|-----------------------------|----------------|---------------------|-----------------------------|----------------|
|                                       | Original assembly   | Add PacBio and 10X genomics | Final assembly | Original assembly   | Add PacBio and 10X genomics | Final assembly |
| <b>Total length (bp)</b>              | 1,086,208,158       | 1,151,255,532               | 1,133,282,102  | 1,008,546,262       | 1,123,989,432               | 1,119,944,395  |
| <b>Longest scaffold (bp)</b>          | 81,761,211          | 88,274,276                  | 80,517,012     | 2,592,627           | 2,684,897                   | 34,145,153     |
| <b>N50 of scaffold</b>                | 523                 | 499                         | 192            | 723                 | 822                         | 213            |
| <b>N50 length of scaffold (bp)</b>    | 359,115             | 408,145                     | 1,217,477      | 391,462             | 367,633                     | 1,055,340      |
| <b>Total length of contigs (bp)</b>   | 1,002,400,532       | 1,090,349,635               | 1,045,027,212  | 955,235,028         | 1,092,146,538               | 1,060,791,339  |
| <b>N50 of contig</b>                  | 13,281              | 6,372                       | 6,124          | 8,479               | 5,824                       | 5,656          |
| <b>N50 length of contig (bp)</b>      | 20,555              | 45,984                      | 45,791         | 33,094              | 51,913                      | 51,736         |
| <b>Number of protein-coding genes</b> | 29,431              | -                           | 29,545         | 28,910              | -                           | 29,257         |

Note: Final assembly is with both PacBio and 10X genomics Linked-reads Data

**Supplementary Table 8 | List of 40 MADS-box genes identified in *A. shenzhenica*.**

| Gene ID   | Name     | ORF (bp) | Protein length (aa) | Type              | Subfamily  | Pseudogene |
|-----------|----------|----------|---------------------|-------------------|------------|------------|
| Ash007825 | AsMADS1  | 1050     | 349                 | MIKC*             |            |            |
| Ash005085 | AsMADS2  | 714      | 237                 | Type I            | M $\alpha$ |            |
| Ash011255 | AsMADS3  | 684      | 227                 | MIKC <sup>c</sup> | B-AP3      |            |
| Ash007845 | AsMADS4  | 1167     | 388                 | Type I            | M $\gamma$ |            |
| Ash003440 | AsMADS5  | 633      | 210                 | MIKC <sup>c</sup> | B-PI       |            |
| Ash005080 | AsMADS6  | 792      | 263                 | MIKC <sup>c</sup> | Bs         |            |
| Ash004262 | AsMADS7  | 822      | 273                 | MIKC <sup>c</sup> | E          |            |
| Ash006974 | AsMADS8  | 720      | 239                 | MIKC <sup>c</sup> | AGL6       |            |
| AsMADS9   | AsMADS9  | 216      | 71                  | MIKC <sup>c</sup> | AGL6       | ✓          |
| Ash015784 | AsMADS10 | 738      | 245                 | MIKC <sup>c</sup> | AGL6       |            |
| Ash018282 | AsMADS11 | 657      | 218                 | MIKC <sup>c</sup> | E          |            |
| Ash006741 | AsMADS12 | 738      | 245                 | MIKC <sup>c</sup> | E          |            |
| Ash002380 | AsMADS13 | 447      | 148                 | MIKC <sup>c</sup> | SQUA       |            |
| Ash015738 | AsMADS14 | 630      | 229                 | MIKC <sup>c</sup> | C/D        |            |
| Ash013457 | AsMADS15 | 750      | 249                 | MIKC <sup>c</sup> | SQUA       |            |
| Ash011284 | AsMADS16 | 450      | 149                 | MIKC <sup>c</sup> | C/D        |            |
| Ash002061 | AsMADS17 | 1188     | 395                 | MIKC*             |            |            |

|           |          |     |     |                   |            |   |
|-----------|----------|-----|-----|-------------------|------------|---|
| Ash015066 | AsMADS18 | 759 | 252 | MIKC <sup>c</sup> | ANR1       |   |
| Ash017092 | AsMADS19 | 762 | 253 | MIKC <sup>c</sup> | ANR1       |   |
| Ash100002 | AsMADS20 | 702 | 233 | MIKC <sup>c</sup> | C/D        |   |
| Ash002488 | AsMADS21 | 879 | 292 | MIKC <sup>c</sup> | C/D        |   |
| Ash003251 | AsMADS22 | 681 | 226 | MIKC <sup>c</sup> | B-AP3      |   |
| Ash007674 | AsMADS23 | 705 | 234 | MIKC <sup>c</sup> | SOC        |   |
| Ash016527 | AsMADS24 | 699 | 232 | MIKC <sup>c</sup> | SVP        |   |
| Ash010253 | AsMADS25 | 486 | 161 | MIKC <sup>c</sup> | ANR1       |   |
| Ash017552 | AsMADS26 | 696 | 231 | MIKC <sup>c</sup> | SVP        |   |
| Ash100001 | AsMADS27 | 342 | 113 | MIKC <sup>c</sup> | ANR1       |   |
| Ash000481 | AsMADS28 | 639 | 212 | MIKC <sup>c</sup> | AGL12      |   |
| Ash002504 | AsMADS29 | 585 | 194 | MIKC <sup>c</sup> | OsMADS32   |   |
| Ash009016 | AsMADS30 | 732 | 243 | Type I            | M $\alpha$ |   |
| Ash011669 | AsMADS31 | 669 | 222 | Type I            | M $\alpha$ |   |
| Ash010387 | AsMADS32 | 810 | 269 | Type I            | M $\alpha$ |   |
| Ash000059 | AsMADS33 | 540 | 179 | Type I            | M $\alpha$ |   |
| Ash003817 | AsMADS34 | 831 | 276 | Type I            | M $\gamma$ |   |
| Ash007838 | AsMADS35 | 660 | 219 | Type I            | M $\gamma$ |   |
| AsMADS36  | AsMADS36 | 204 | 67  | MIKC <sup>*</sup> |            | ✓ |
| Ash015872 | AsMADS37 | 648 | 215 | MIKC <sup>c</sup> | SOC        |   |
| AsMADS38  | AsMADS38 | 492 | 163 | MIKC <sup>c</sup> | SVP        | ✓ |

|           |          |     |     |                   |            |   |
|-----------|----------|-----|-----|-------------------|------------|---|
| Ash012123 | AsMADS39 | 756 | 251 | Type I            | M $\gamma$ |   |
| AsMADS40  | AsMADS40 | 357 | 118 | MIKC <sup>c</sup> |            | ✓ |

---

**Supplementary Table 9 | Summary of repeat annotation of *A. shenzhenica*.**

|         | RepBase TEs    |               | TE Proteins    |                | <i>De novo</i> |                | Combined TEs   |                |
|---------|----------------|---------------|----------------|----------------|----------------|----------------|----------------|----------------|
|         | Length<br>(bp) | %in<br>Genome | Length<br>(bp) | % in<br>Genome | Length<br>(bp) | % in<br>Genome | Length<br>(bp) | % in<br>Genome |
| DNA     | 3,604,289      | 1.03          | 3,106,810      | 0.89           | 18,995,301     | 5.45           | 22,534,396     | 6.46           |
| LINE    | 10,240,458     | 2.94          | 9,511,200      | 2.73           | 41,316,780     | 11.85          | 44,203,442     | 12.68          |
| SINE    | 12,411         | 0.00          | 0              | 0.00           | 149,789        | 0.04           | 161,345        | 0.05           |
| LTR     | 10,644,451     | 3.05          | 15,167,007     | 4.35           | 72,767,333     | 20.87          | 76,930,066     | 22.06          |
| Other   | 5,732          | 0.00          | 0              | 0.00           | 0              | 0.00           | 5,732          | 0.00           |
| Unknown | 38,684         | 0.01          | 0              | 0.00           | 20,482,533     | 5.87           | 20,520,835     | 5.88           |
| Total   | 24,555,914     | 7.04          | 27,699,462     | 7.94           | 137,241,384    | 39.35          | 146,653,786    | 42.05          |

**Supplementary Table 10 | Length distribution of gene elements in twelve sequenced plants.**

| Species               | Protein coding gene number | Average          | Median           | Average         | Median          | Average exon per gene | Average          | Median           | Average            | Median             | Average                       | Median                        |
|-----------------------|----------------------------|------------------|------------------|-----------------|-----------------|-----------------------|------------------|------------------|--------------------|--------------------|-------------------------------|-------------------------------|
|                       |                            | gene length (bp) | gene length (bp) | CDS length (bp) | CDS length (bp) |                       | exon length (bp) | exon length (bp) | intron length (bp) | intron length (bp) | intergenic region length (bp) | intergenic region length (bp) |
| <i>A. shenzhenica</i> | 21,841                     | 6137.69          | 2518.00          | 1099.28         | 876.00          | 4.50                  | 244.17           | 138.00           | 1438.65            | 403.00             | 9531.45                       | 6177.00                       |
| <i>P. equestris</i>   | 29,545                     | 8373.90          | 1185.00          | 841.32          | 570.00          | 3.56                  | 236.05           | 150.00           | 2937.72            | 381.00             | 24903.93                      | 12783.00                      |
| <i>D. catenatum</i>   | 29,257                     | 7816.87          | 1757.00          | 1011.00         | 756.00          | 3.85                  | 262.52           | 148.00           | 2387.03            | 329.00             | 22639.53                      | 10503.50                      |
| <i>Z. mays</i>        | 39,815                     | 3361.45          | 1824.00          | 1091.32         | 915.00          | 4.51                  | 241.77           | 134.00           | 646.06             | 152.00             | 49040.89                      | 23226.50                      |
| <i>S. bicolor</i>     | 27,160                     | 2942.00          | 2165.00          | 1260.98         | 1095.00         | 4.85                  | 259.90           | 136.50           | 436.44             | 145.00             | 22363.18                      | 5336.00                       |
| <i>O. sativa</i>      | 35,402                     | 2177.38          | 1479.50          | 998.58          | 810.00          | 3.80                  | 262.69           | 142.00           | 420.79             | 150.00             | 9459.07                       | 4625.00                       |
| <i>P. heterocycla</i> | 31,987                     | 3099.24          | 2373.00          | 1210.22         | 981.00          | 5.28                  | 229.03           | 132.00           | 440.95             | 209.00             | 35884.38                      | 21907.50                      |
| <i>A. thaliana</i>    | 26,637                     | 1909.57          | 1593.00          | 1242.78         | 1065.00         | 5.23                  | 237.50           | 134.00           | 157.54             | 98.00              | 2569.35                       | 1223.00                       |
| <i>V. vinifera</i>    | 25,328                     | 6129.29          | 3160.00          | 1177.49         | 918.00          | 6.12                  | 192.54           | 123.00           | 967.97             | 208.00             | 13026.83                      | 5015.00                       |
| <i>A. officinalis</i> | 27,375                     | 6835.52          | 3385.00          | 1004.02         | 732.00          | 5.03                  | 199.52           | 124.00           | 1446.29            | 361.00             | 34806.10                      | 13301.00                      |
| <i>A. comosus</i>     | 27,024                     | 4341.80          | 2903.00          | 1171.28         | 927.00          | 5.53                  | 211.68           | 123.00           | 699.41             | 295.00             | 9286.57                       | 4375.00                       |
| <i>A. trichopoda</i>  | 25,933                     | 5761.95          | 1308.00          | 962.18          | 669.00          | 4.16                  | 231.31           | 136.00           | 1519.05            | 397.00             | 20684.78                      | 11242.00                      |

Note: We considered the start and stop codons as the two boundaries for calculating gene length.

**Supplementary Table 11 | Gene function annotation of *A. shenzhenica*.**

|             |                    | <b>Number</b> | <b>Percent (%)</b> |
|-------------|--------------------|---------------|--------------------|
| Total       |                    | 21,841        |                    |
| Annotated   | InterPro           | 14,693        | 67.27              |
|             | GO                 | 10,499        | 48.07              |
|             | KEGG               | 10,283        | 47.08              |
|             | SwissProt          | 11,578        | 53.01              |
|             | TrEMBL             | 18,277        | 83.68              |
|             | NCBI non-redundant | 18,243        | 83.52              |
| Unannotated |                    | 3,449         | 15.79              |

**Supplementary Table 12 | Summary of ncRNA annotation of *A. shenzhenica*.**

| Type  | Number   | Average length<br>(bp) | Total length<br>(bp) | % of genome |
|-------|----------|------------------------|----------------------|-------------|
| miRNA | 43       | 125.56                 | 5,399                | 0.00155     |
| tRNA  | 203      | 74.75                  | 15,174               | 0.00435     |
| rRNA  | rRNA     | 452                    | 73,530               | 0.02109     |
|       | 18S      | 35                     | 27,014               | 0.00775     |
|       | 28S      | 26                     | 5,017                | 0.00144     |
|       | 5.8S     | 11                     | 1,669                | 0.00048     |
|       | 5S       | 380                    | 39,830               | 0.01142     |
| snRNA | snRNA    | 93                     | 9,635                | 0.00276     |
|       | CD-box   | 45                     | 4,429                | 0.00127     |
|       | HACA-box | 0                      | 0                    | 0.00000     |
|       | splicing | 48                     | 5,206                | 0.00149     |
|       | scaRNA   | 0                      | 0                    | 0.00000     |



Supplementary Table 13 | Information about the transcriptomes used in this study.

| Family       | Subfamily      | Species                       | Tissues used in genome annotation         | Tissues used in expression analysis          | Tissues used in WGD and phylogenetic analysis                                | Number of predicted proteins    | Number of predicted proteins with plant homologs |            |                                  |              |
|--------------|----------------|-------------------------------|-------------------------------------------|----------------------------------------------|------------------------------------------------------------------------------|---------------------------------|--------------------------------------------------|------------|----------------------------------|--------------|
| Orchidaceae  | Apostasioideae | <i>Apostasia shenzhenica</i>  | Flower bud, leaf, root, seed, stem, tuber | flower bud, pollen, stem, root, leaf, seed   |                                                                              |                                 |                                                  |            |                                  |              |
|              |                | <i>Apostasia odorata</i>      |                                           |                                              | flower bud                                                                   | 23,504                          | 18,030                                           |            |                                  |              |
|              |                | <i>Neuwiedia malipoensis</i>  |                                           |                                              | flower                                                                       | 25,211                          | 23,011                                           |            |                                  |              |
|              | Vanilloideae   | <i>Vanilla shenzhenica</i>    |                                           | flower bud, pollinia, stem, root, leaf       | floral bract, lip, sepal, column, leaf, node with leaf and root, aerial root |                                 | 25,767                                           | 18,188     |                                  |              |
|              |                |                               | <i>Lecanorchis nigricans</i>              |                                              |                                                                              | flower                          | 19,529                                           | 16,608     |                                  |              |
|              |                |                               | <i>Galeola faberi</i>                     |                                              |                                                                              | flower                          | 19,093                                           | 16,969     |                                  |              |
|              |                |                               | Cypripedioideae                           |                                              |                                                                              | <i>Paphiopedilum malipoense</i> | flower bud, pollinia, stem, root, leaf           | flower bud | 24,360                           | 20,631       |
|              |                |                               |                                           |                                              |                                                                              |                                 |                                                  |            | <i>Cypripedium margaritaceum</i> | flower, leaf |
|              | Orchidoideae   | <i>Hemipilia forrestii</i>    | <i>Habenaria delavayi</i>                 | flower                                       | flower                                                                       | 20,641                          | 18,295                                           |            |                                  |              |
|              |                |                               |                                           |                                              |                                                                              | leaf                            | 20,260                                           | 17,842     |                                  |              |
|              | Epidendroideae | <i>Phalaenopsis equestris</i> | <i>Dendrobium catenatum</i>               | flower bud, pollinia, stem, root, leaf, seed | flower bud, pollinia, stem, root, leaf                                       |                                 |                                                  |            |                                  |              |
|              |                |                               |                                           |                                              |                                                                              |                                 |                                                  |            |                                  |              |
| Hypoxidaceae |                | <i>Molineria capitulata</i>   |                                           | flower bud, pollen, stem, root, leaf, seed   | flower bud                                                                   | 26,430                          | 19,865                                           |            |                                  |              |

**Supplementary Table 14 | Summary of orthologous gene families in 15 sequenced plant species.**

| Species               | Genes  | Unclustered genes | Clustered genes | Familys | Unique families | Unique families genes | Common families | Common families genes | Single Copy | Average genes per family |
|-----------------------|--------|-------------------|-----------------|---------|-----------------|-----------------------|-----------------|-----------------------|-------------|--------------------------|
| <i>A. comosus</i>     | 27,024 | 5,950             | 21,074          | 13,279  | 936             | 3,346                 | 4,120           | 7,079                 | 439         | 1.587                    |
| <i>A. shenzhenica</i> | 21,841 | 3,573             | 18,268          | 11,995  | 562             | 2,789                 | 4,120           | 6,121                 | 439         | 1.523                    |
| <i>A. officinalis</i> | 27,375 | 8,220             | 19,155          | 12,014  | 901             | 3,521                 | 4,120           | 6,920                 | 439         | 1.594                    |
| <i>A. thaliana</i>    | 26,637 | 3,750             | 22,887          | 12,719  | 859             | 3,466                 | 4,120           | 8,108                 | 439         | 1.799                    |
| <i>A. trichopoda</i>  | 25,933 | 7,699             | 18,234          | 12,200  | 1,044           | 4,206                 | 4,120           | 5,758                 | 439         | 1.495                    |
| <i>B. distachyon</i>  | 26,415 | 3,655             | 22,760          | 15,344  | 421             | 1,240                 | 4,120           | 7,748                 | 439         | 1.483                    |
| <i>D. catenatum</i>   | 29,257 | 5,339             | 23,918          | 14,050  | 1,036           | 4,183                 | 4,120           | 6,638                 | 439         | 1.702                    |
| <i>M. acuminata</i>   | 34,241 | 8,710             | 25,531          | 12,865  | 538             | 1,359                 | 4,120           | 10,792                | 439         | 1.985                    |
| <i>O. sativa</i>      | 35,402 | 11,106            | 24,296          | 16,352  | 958             | 2,473                 | 4,120           | 7,604                 | 439         | 1.486                    |
| <i>P. dactylifera</i> | 23,890 | 6,281             | 17,609          | 11,011  | 444             | 1,431                 | 4,120           | 7,331                 | 439         | 1.599                    |
| <i>P. equestris</i>   | 29,545 | 6,420             | 23,125          | 13,752  | 1,197           | 5,887                 | 4,120           | 6,112                 | 439         | 1.682                    |
| <i>P. trichocarpa</i> | 40,984 | 7,683             | 33,301          | 14,471  | 1,362           | 4,181                 | 4,120           | 11,440                | 439         | 2.301                    |
| <i>S. bicolor</i>     | 27,160 | 3,723             | 23,437          | 15,749  | 361             | 984                   | 4,120           | 7,893                 | 439         | 1.488                    |
| <i>S. polyrrhiza</i>  | 18,357 | 5,095             | 13,262          | 10,076  | 264             | 797                   | 4,120           | 5,672                 | 439         | 1.316                    |
| <i>V. vinifera</i>    | 25,328 | 6,032             | 19,296          | 12,808  | 643             | 1,833                 | 4,120           | 7,113                 | 439         | 1.507                    |

Unique families = families present only in one species

**Supplementary Table 15 | The GO term enrichment of *A. shenzhenica* lineage significantly contracted gene families.**

| GO ID      | GO Term                          | GO Class | P value         | Adjusted P value | x1 | x2   | n  | N     | GO level |
|------------|----------------------------------|----------|-----------------|------------------|----|------|----|-------|----------|
| GO:0005507 | copper ion binding               | MF       | 1.69E-18        | 9.95E-17         | 9  | 74   | 18 | 21841 | 7        |
| GO:0003824 | catalytic activity               | MF       | 2.61E-12        | 1.54E-10         | 18 | 4970 | 18 | 21841 | 2        |
| GO:0008152 | metabolic process                | BP       | 9.77E-12        | 5.76E-10         | 18 | 5347 | 18 | 21841 | 2        |
| GO:0005488 | binding                          | MF       | 1.38E-10        | 8.16E-09         | 18 | 6194 | 18 | 21841 | 2        |
| GO:0004713 | protein tyrosine kinase activity | MF       | 3.13E-10        | 1.85E-08         | 9  | 597  | 18 | 21841 | 7        |
| GO:0055114 | oxidation-reduction process      | BP       | 9.01E-10        | 5.31E-08         | 9  | 673  | 18 | 21841 | 3        |
| GO:0006468 | protein phosphorylation          | BP       | 9.12E-10        | 5.38E-08         | 9  | 674  | 18 | 21841 | 6        |
| GO:0016491 | oxidoreductase activity          | MF       | 4.06E-09        | 2.39E-07         | 9  | 799  | 18 | 21841 | 3        |
| GO:0046872 | metal ion binding                | MF       | 9.87E-08        | 5.82E-06         | 10 | 1582 | 18 | 21841 | 5        |
| GO:0005524 | ATP binding                      | MF       | 2.15E-07        | 1.27E-05         | 9  | 1265 | 18 | 21841 | 8        |
| GO:0005515 | protein binding                  | MF       | 1.14E-05        | 0.00067253       | 9  | 2031 | 18 | 21841 | 3        |
| GO:0044238 | primary metabolic process        | BP       | 0.0005568<br>37 | 0.03285341<br>2  | 10 | 4120 | 18 | 21841 | 3        |

Note: N: total gene number; n: gene number in the list; x1: gene number with a GO term in the list; x2: gene number with a GO term in total.

**Supplementary Table 16 | The GO term enrichment of *A. shenzhenica* lineage significantly expanded gene families.**

| GO ID      | GO Term                                   | GO Class | P value  | Adjusted<br>P value | x1 | x2   | n  | N     | GO level |
|------------|-------------------------------------------|----------|----------|---------------------|----|------|----|-------|----------|
| GO:0006259 | DNA metabolic process                     | BP       | 4.44E-40 | 2.93E-38            | 38 | 702  | 65 | 21841 | 5        |
| GO:0003964 | RNA-directed DNA polymerase activity      | MF       | 3.37E-36 | 2.22E-34            | 29 | 322  | 65 | 21841 | 7        |
| GO:0006278 | RNA-dependent DNA replication             | BP       | 3.37E-36 | 2.22E-34            | 29 | 322  | 65 | 21841 | 7        |
| GO:0003723 | RNA binding                               | MF       | 1.95E-28 | 1.28E-26            | 29 | 593  | 65 | 21841 | 4        |
| GO:0015074 | DNA integration                           | BP       | 3.37E-23 | 2.22E-21            | 18 | 177  | 65 | 21841 | 6        |
| GO:0044249 | cellular biosynthetic process             | BP       | 3.61E-18 | 2.38E-16            | 32 | 1796 | 65 | 21841 | 4        |
| GO:0016740 | transferase activity                      | MF       | 2.60E-17 | 1.71E-15            | 32 | 1921 | 65 | 21841 | 3        |
| GO:0044237 | cellular metabolic process                | BP       | 1.94E-16 | 1.28E-14            | 41 | 3758 | 65 | 21841 | 3        |
| GO:0003676 | nucleic acid binding                      | MF       | 3.22E-16 | 2.12E-14            | 30 | 1783 | 65 | 21841 | 3        |
| GO:0044238 | primary metabolic process                 | BP       | 5.37E-15 | 3.54E-13            | 41 | 4120 | 65 | 21841 | 3        |
| GO:0008152 | metabolic process                         | BP       | 2.29E-13 | 1.51E-11            | 44 | 5347 | 65 | 21841 | 2        |
| GO:0003824 | catalytic activity                        | MF       | 5.12E-08 | 3.38E-06            | 35 | 4970 | 65 | 21841 | 2        |
| GO:0004144 | diacylglycerol O-acyltransferase activity | MF       | 5.00E-07 | 3.30E-05            | 3  | 6    | 65 | 21841 | 8        |
| GO:0005488 | binding                                   | MF       | 4.34E-06 | 0.000287            | 36 | 6194 | 65 | 21841 | 2        |
| GO:0045017 | glycerolipid biosynthetic process         | BP       | 7.81E-05 | 0.005158            | 3  | 28   | 65 | 21841 | 5        |
| GO:0046914 | transition metal ion binding              | MF       | 9.27E-05 | 0.006116            | 12 | 1110 | 65 | 21841 | 6        |
| GO:0006979 | response to oxidative stress              | BP       | 0.000326 | 0.021548            | 3  | 45   | 65 | 21841 | 4        |
| GO:0004601 | peroxidase activity                       | MF       | 0.000446 | 0.029449            | 3  | 50   | 65 | 21841 | 3        |

Note: N: total gene number; n: gene number in the list; x1: gene number with a GO term in the list; x2: gene number with a GO term in total.

**Supplementary Table 17 | The KEGG Pathway enrichment of *A. shenzhenica* lineage significantly contracted gene families.**

| <b>MapID</b> | <b>MapTitle</b>                   | <b>P value</b> | <b>Adjusted P value</b> | <b>x</b> | <b>y</b> | <b>n</b> | <b>N</b> |
|--------------|-----------------------------------|----------------|-------------------------|----------|----------|----------|----------|
| map00053     | Ascorbate and aldarate metabolism | 5.53E-17       | 4.42E-16                | 8        | 57       | 18       | 21841    |
| map04626     | Plant-pathogen interaction        | 2.09E-10       | 1.67E-09                | 8        | 364      | 18       | 21841    |
| map01100     | Metabolic pathways                | 9.33E-06       | 7.46E-05                | 9        | 1982     | 18       | 21841    |

Note: N: total gene number; n: gene number in the list; x: gene number with a KEGG term in the list; y: gene number with a KEGG term in total.

**Supplementary Table 18 | The KEGG pathway enrichment of *A. shenzhenica* lineage significantly expanded gene families.**

| MapID    | MapTitle                             | P value  | Adjusted P value | x  | y   | n  | N     |
|----------|--------------------------------------|----------|------------------|----|-----|----|-------|
| map03440 | Homologous recombination             | 1.23E-31 | 1.36E-30         | 20 | 104 | 65 | 21841 |
| map03008 | Ribosome biogenesis in eukaryotes    | 6.19E-13 | 6.81E-12         | 12 | 199 | 65 | 21841 |
| map03018 | RNA degradation                      | 1.64E-12 | 1.80E-11         | 12 | 216 | 65 | 21841 |
| map00073 | Cutin, suberine and wax biosynthesis | 0.000266 | 0.002924         | 3  | 42  | 65 | 21841 |
| map03015 | mRNA surveillance pathway            | 0.00097  | 0.010668         | 4  | 147 | 65 | 21841 |
| map00360 | Phenylalanine metabolism             | 0.001194 | 0.013139         | 3  | 70  | 65 | 21841 |

Note: N: total gene number; n: gene number in the list; x: gene number with a KEGG term in the list; y: gene number with a KEGG term in total.

**Supplementary Table 19 | GO term enrichment of *A. shenzhenica*-specific gene families.**

| GO ID      | GO Term                              | GO Class | P value  | Adjusted P value | x1 | x2  | n    | N     | GO level |
|------------|--------------------------------------|----------|----------|------------------|----|-----|------|-------|----------|
| GO:0003964 | RNA-directed DNA polymerase activity | MF       | 3.24E-05 | 0.010411         | 67 | 322 | 2789 | 21841 | 7        |
| GO:0006278 | RNA-dependent DNA replication        | BP       | 3.24E-05 | 0.010411         | 67 | 322 | 2789 | 21841 | 7        |

Note: N: total gene number; n: gene number in the list; x1: gene number with a GO term in the list; x2: gene number with a GO term in total.

**Supplementary Table 20 | GO term enrichment of Orchidaceae-specific gene families.**

| GO ID      | GO Term                          | GO Class | P value  | Adjusted P value | x1 | x2 | n   | N     | GO level |
|------------|----------------------------------|----------|----------|------------------|----|----|-----|-------|----------|
| GO:0008171 | O-methyltransferase activity     | MF       | 3.91E-07 | 9.90E-05         | 8  | 28 | 568 | 21841 | 6        |
| GO:0008234 | Cysteine-type peptidase activity | MF       | 4.45E-05 | 0.011261         | 6  | 26 | 568 | 21841 | 7        |

Note: N: total gene number; n: gene number in the list; x1: gene number with a GO term in the list; x2: gene number with a GO term in total.



**Supplementary Table 21 | KEGG pathway enrichment of Orchidaceae-specific gene families.**

| MapID    | MapTitle                                              | P value  | Adjusted P value | x  | y  | n   | N     |
|----------|-------------------------------------------------------|----------|------------------|----|----|-----|-------|
| map00945 | Stilbenoid, diarylheptanoid and gingerol biosynthesis | 7.75E-07 | 3.87E-05         | 12 | 78 | 568 | 21841 |
| map00944 | Flavone and flavonol biosynthesis                     | 5.79E-05 | 0.0028937        | 7  | 39 | 568 | 21841 |

Note: N: total gene number; n: gene number in the list; x: gene number with a KEGG term in the list; y: gene number with a KEGG term in total.

**Supplementary Table 22 | GO term enrichment of monocot-specific gene families.**

| GO ID      | GO Term                                                 | GO Class | P value  | Adjusted P value | x1 | x2 | n  | N     | GO level |
|------------|---------------------------------------------------------|----------|----------|------------------|----|----|----|-------|----------|
| GO:0000156 | two-component response regulator activity               | MF       | 5.43E-06 | 0.000521         | 3  | 20 | 38 | 21841 | 4        |
| GO:0015299 | solute:hydrogen antiporter activity                     | MF       | 1.23E-05 | 0.00118          | 3  | 26 | 38 | 21841 | 8        |
| GO:0015298 | solute:cation antiporter activity                       | MF       | 1.23E-05 | 0.00118          | 3  | 26 | 38 | 21841 | 7        |
| GO:0000160 | two-component signal transduction system (phosphorelay) | BP       | 1.54E-05 | 0.001483         | 3  | 28 | 38 | 21841 | 4        |
| GO:0015300 | solute:solute antiporter activity                       | MF       | 1.91E-05 | 0.001833         | 3  | 30 | 38 | 21841 | 7        |
| GO:0004871 | signal transducer activity                              | MF       | 7.96E-05 | 0.007643         | 3  | 48 | 38 | 21841 | 3        |
| GO:0060089 | molecular transducer activity                           | MF       | 7.96E-05 | 0.007643         | 3  | 48 | 38 | 21841 | 2        |
| GO:0015078 | hydrogen ion transmembrane transporter activity         | MF       | 0.000188 | 0.018061         | 3  | 64 | 38 | 21841 | 9        |
| GO:0015297 | antiporter activity                                     | MF       | 0.000245 | 0.023559         | 3  | 70 | 38 | 21841 | 6        |
| GO:0015291 | secondary active transmembrane transporter activity     | MF       | 0.000364 | 0.034939         | 3  | 80 | 38 | 21841 | 5        |

Note: N: total gene number; n: gene number in the list; x1: gene number with a GO term in the list; x2: gene number with a GO term in total.

**Supplementary Table 23 | KEGG pathway enrichment of monocot-specific gene families.**

| Map ID   | Map Title                         | P value  | Adjusted P value | x | y   | n  | N     |
|----------|-----------------------------------|----------|------------------|---|-----|----|-------|
| map04075 | Plant hormone signal transduction | 0.000748 | 0.007479         | 5 | 418 | 38 | 21841 |
| map03020 | RNA polymerase                    | 0.004582 | 0.045821         | 2 | 58  | 38 | 21841 |

Note: N: total gene number; n: gene number in the list; x: gene number with a KEGG term in the list; y: gene number with a KEGG term in total.

## Supplementary Data

### Supplementary Data 1 | The protein sequences of *A. shenzhenica* MADS-box genes.

>Ash005085

MATVGKKRQSMGRQKIPMKRIEREEARQVCF SKRRVGLFKKATELSILCGAEIGIVVFSPAGKP  
FSFGHPSLDYIIKRFAGGDRI RGVGPMLAAQGIDCGALQGLNINHARLTEELEEQR RRKEVLEA  
SMEALRSSDHRRPLWEADVHEMG MEELESFQKALEVLWRNVASRREEIEIMMEVEYWRPAA  
APVAYGGGGYAGSCNGLYLTPPSLVPGGGGLADGFCSCGIERAYFWG

>Ash007845

MRASFRLGLFCSMAASSPAKWTARE DKEFERALATFGEQTPNRWERVAAAVGGGKTAAD  
VGRHYQLLLDDIDSIESGRV PFPNYRTPQAPATTAGRGGGAAAAILSHDCHRSPVPAMARKKIS  
LAYITNEATRRATLKKRRRGLMKKVRELSVLCGVSACAVVYAPPDPKPEVWPSTEEAAEILRKF  
CCMPDVKARKMMNQESFLLQRQNK LQEQLRRLTHENDELAANLLRQCLAGRPASTLCREE  
IFVLLCLIERRSKAVQVRLDQLRAQAERFGSSPEIYLPGGQSPPLPLPAPLMLPAPLPLQVKDF  
KDPIGFDSAAIEAMRRCDWLSGGVSGDHAPEVTGGELQIMPYAQGPVAPGCASASGGFDDML  
AMFIDPAIYI

>Ash009016

MMTVRKKRQSMGRQKIPMKRIESEEARQVCF SKRRSGLFKKATELSILCGAEIGIVVFSPAGKP  
FSFGHPSLDYIIKRFAGGDGTRGMGPMGAAQ GIDYGALQELNINHARLTEELEEQR RRKEVLE  
AAIEALRCGDHRRALPWEADVHEMG IEELESFQRALEVLWRSVASRREEIEIMMEVETKAAVAA  
AAAAAATPMAYGGGGYVGGCNGLYLTPPSLLPGGGVAGGFYSRGLERPYFWG

>Ash011669

MKRIESEEARQVCF SKRRSGLFKKATELSILCGAEIGIVVFSPAGKPF SFHGHPSLDYIIKRFAGGD  
RIRGVGPMSTAHDGSLQDLNINHARLTEELEEQR RRKEALEVAMEALRSSDHRRALPWKA  
DVHEMEMEELESFQKVLEVLWGNV ASRREEIEIMMEVETRAAAAAAAAAAAAAAPVAYGYVGS  
CNGLYLTPPSLVPDLTPPSLVPAGCISRLHP

>Ash010387

MQFTNGNNYISTQKSPKIKPTNRMHLIPLDFPLYRSSPSIKEPPSLLLIFLLLLLLLLLLLLMSAINVIA  
RRKRKASSGRRKIEIKKIENEDARHVSFSKRR CGLFTKACDLATLCGV ELAIVVYSAAGNPYSFG  
SPTVDSVVD RFLAGRPDRVEPGRMNQAGLVQVLNQQCMDLAAQIRAAEERRSSLELRIRAAG  
ESNLLSQLTNDEEDASPMQLEK LKLLLDLRRKVDYRFADLLSGKEAIEFNSNL TSSQLVELDVV  
GGWPGYEL

>Ash000059

MGRQKIEIKKIENEDARLVSFSSKRRSGLFNKASCLTTLGVDAAVVVFSPAGTPYSFGSPRVEM  
VVDRFLSSGREMEEPNNFFRQHHATSVQELNRRCMELNQVEAAQARRRALEERLSAVAAVRD  
EPEEMEVEELEALKEALNQLKKMTDEHMKERAAGSSSSAAQNEAGPSTPLDLG

>Ash003817

MARKKVTLAWICNDATRRATLKKRRRGLMKKVKELSILCDVRACAIVYSPHETQPEVWPSVAE  
AARILARFRSMPEIEQSKMLDQESFLRQRVARLHDQLNRLQRENHELEAAAVLRECLAGSSLL  
DLRIEELASLAWMLEHKAKVVQERIDQHLILAAAPELEMPPEMAGAGAEVDAGPLQPPGPPPP  
PPPPPLLSLIGDGKFIPECHEGEFRWIPGGSGGHEAYSGAAAGPAPVGERDYFGGGGGGGEV  
AELGLLDHHDKQQSGWENCFFHLY

>Ash007838

MARKKISLAYITNEATRRATLKKRRRGLMKKVRELSVLCGVSACAVVYAPPDPKPEVWPSTEE  
AAEILRFCCMPDVKARKMMNQESFLLQRQNKLQEQLRRLTHEDELAAANLLRQCLAGRP  
ASTLCRKEIFVLLCLIERRSKAVQVRLDQLRAQAERFGSSPEIYLPGGQSPPSLPLPAPLMLPAP  
SPLQVKDFTDPIGFDSAAIEAMLLCDWLS

>Ash012123

MARKKVLEWIANDSARRATLKKRRKGLLKKASELSTLCDVKACLILFAAGEPQPEVWPSHHE  
AARILAKLKRLEPEMEQGKMMNQEGFMRQRITKLQEQLQKQERENRELETTLLMYQGLMGKT  
MSDVSIKDLTSLAWLIELKVNQVRKRLDALRKNATPPPQQQPAAAAAAVAVKKENASPQLPP  
AAAEKTALEVAMEELQKQDWFSEIMMNPLAAHEEMMGHLSFLELAGSGFLGGAWPDAYFPV  
N

>Ash007825

MGRVKLKIKRLENTSGRQVTYSKRRAGILKKAKELSILCDIDILLMFSPTTEKPTLCLGERSNIDII  
TKFAQLTPQERAKRELESLEALKKTFKKLDHDVNIQDFLGSSQTVEDLTNHSRALQAQISEVER  
KLSCWTDPEKVN SIDQVRQMEETLRESLNRIQMKEYLGKQLVSLDCSGQFPNGLNLPALN  
NDIQSSHMQWFYDNNGQNLMLLQDSSFLHQRNRECSTDTMLQGYPGFFSTEKQAGYCKNGT  
DESLNELSQNSCLQLQLGAQYPYQPYGLNMLGEKKFGPDGEVSLQEDHIHLQVNGFEQPKPG  
YDAGTQNWASISCSGCGVMFDDQLCPQQQNQT

>Ash011255

MGRGRIEIKKIENPTNRQVTYSKRRLGIMKKAKELSVLCDAHVSLLMFSSTGKLADY CSPSTNIK  
GIIERYQHATGVDLWNAQYERMQETMKQLKEVNQSLRKEIRQRTGEDVEGLEMMELRGLEQSI  
EESLRIVRQRKYHVITTQTDITYKKKSTKEANWALMHLMKGEIPQYDLVAEDPTSVDSTM

SMVNVVPRMFAFNVIHPNQQLGIDYDSDLSLR

>Ash003440

MGRGKIEIKRIENSTNRQVTF SKRRNGIMKKAREISVLCDAQVSLVIFSSLGKMSEYCSPSTTLS  
KMLERYQQNSGKKLWDAKHENLSAEIDRIKKENDNMQIELRHLKGEDVNSLNPKELIPIEEALQ  
NGLASVREKQMDFLKMLKKKEMMLEEENKRLTYLLHHQQLAMEGSMRDLDISYHQKDFEFAS  
QMPMTFRLQPIQPNLQGNK

>Ash005080

MGRGKIEIKRIENPTNRQVTF SKRRGGLLKAHELAVLTDAQVGLVVFSTSGKMYDYCSPASS  
MREIIERYLKATNAHFDDHSSQQQLYCEITRIRHETDRLQATIKQFTGEELSGLTINDLNQLED  
HLEFSVNKVRFRKHQLLHQLENLRRKVVNIFVVRHGAQEHILEDQNNYLCRALAEHHVAMEQ  
QQAADHYEENKAREMGFLHEPSSLIGNFLSSVADDSAGNLLQLGPQVHGFQLQPTQPNLQDP  
ALHGYALQLW

>Ash004262

MVRVREKEREREREREREREEKEKLEKKGKMGRRVELKRIENKINRQVTF AKRRNGLLKKAY  
ELSVLCDAEVALIIFSNRGRLEFCSSSSMTQTLERYQTCSYNAGESMVPSKETQNTYQEYLKL  
KARVEYLQRSQRNLLGEDLGQLSTKELEQLENQVEMSLKQIRSTKTQLMLDQLCDLKRKEQML  
QEANKALKKKLQEDGPEIPLQLSWPSGSGSRGSGEHEPQSDAFFQPLTCDPSLQIGYTPLCTD  
QRLNAGLSTHNINGFIPGWM

>Ash006974

MGRGRVELKRIENKINRQVTF SKRRNGIMKKAYELSVLCDAEVALIIFSCRGKLF EFGSPDITKTL  
ERYKRCTFTPQAIDPNDHETLNWYQELSKLKAKYESLQRSQRHLLGEDLDELSELKELQQLERQ  
LELSLTQARQKRTLLMLDQMEEIQIKERHLGDINKQLKHKLEIEGGSMRAIQGSSWLQLDNEAL  
SSCSRARDPGPTLEIGRYHHYAPTGREAAAGPRNGASGNFMPGWAP

>Ash015784

MGRGRVELKRIENKINRQVTF SKRRNGLLKKAYELSVLCDAEVALIVFSSRGKLYEFGSAGTSK  
TLERYQSCCYNSQATNNVARDTQNWYQEVTKLKAKFESLQRSHRHLLGEDLGPLSVKELQQ  
LERQLESALSQARQRKTQIMLDQMEELRKKERQLGEINKQLKMKLEAGGSLRLMQGPWEPE  
AVPEDHHAFQLHLSHSTAMECDPSLHIGYHQFVPEAAMP RSNDGDQNN SFMLGWML

>Ash018282

MGRGRVELKRIENKINRQVTFAKRRNGLLKKAYELSVLCDAEVALIIFSNRGKLYEFCSSSSMLK  
TLERYQKCNYGAPEANIISRETQSSQQEYLKLRVEALQRSQRNLLGEDLGPLSSKELEQLER  
QLDASLKQIRSTRTQNMLDQLADLQRREQMLCEANKALKRRLEESSQTNPQQVWDPSTAHAV  
GYGRQAAQAHGDAFYHPLECEPTLQIG

>Ash006741

MGRGRVELKRIENKINRQVTFAKRRNGLLKKAYELSVLCDAEVALIIFSNRGKLYEFCSSSSMLR  
TLERYQKCNFGAPETNIISRETQSSQQEYLKLRTRVEALQRSQRNLLGEDLGPLSSIDLEQLER  
QLDASLKQIRSTRTQHMLDQLADLQRKEQMLCEANRSLRRRLEEASCLENPPESWNNPNSAQ  
AVVYGRQTIHTQADDFYHPLVCEPTLQMGYHSDITMASATVPSVGNFVLPGWLA

>Ash002380

MGRGRVQLKRIENKINRQVTFKRRSGLLKAHEISVLCDAEVALIVFSNKGKLYEYSTDSSME  
RILERYERYSYTERALFSNEADPQANWCLEYNKLKARVESLQKSQRHLMGEQLDSLVSKEIQH  
LEQQLESSLKHIRSKKTQLLIDSISELQRKENILQEQNKNMEKEIIAKEKAKSLAQNASFEQQNQS  
QYSSSSPHVLVSVSAPTCSRYGGQISEASQTSKQQ

>Ash015738

MGRGRVEIKRIENTTNRQVTFCKRRNGLLKKAYELSVLCDAEIALIIFSSRGRLYEYANHSVKGTI  
ERYKKASSDNSNAGSISEANSQYYQQEASKLRQQITNLQNSNRNLMGEALSNMNAKDLKQLE  
TRLEKGISKIRAKKNELLYAEIEYMQKREIELQNDNAYLRNKIADNESIQQHQHMMNLLPSTSNE  
YDILPPFDISRNFLQVNLMDPSHQYSHQQQTALQLG

>Ash013457

MGRGRVQLKRIENKINRQVTFKRRAGLLKKAFEISVLCDIEVALIVFSTKGKLYEYSTDSSMERI  
LERYERHCYAGKGLMSSQPELQEDMCQEYGLKSKVEALQRSQSHMMGEKLDLSTKELQQI  
EQKLEIALELIRLRKNQSLLDITITELQCKERSLIEQNSVLEKKILQIDKARRMTNQQWEQQTQAQ  
PCSSPSTFLLNDTLPILNIGQYPARIGAAQEDNSAQPLGRRNGNGLPQWMLRSPT

>Ash011284

MGRGKIEIKRIENTTNRQVTFCKRRNGLLKKAYELSVLCDAEVALIIFSSRGRLYEYANNSVKGTI  
ERYKKASTDISNTGSFSEANSLYYKQEASKLHQQITNLQNSNRNLMGDAVSNMNIRELRQLEK  
RLEASINKIRSKKNELLYAEIEYLQKRDVELNNDYMYLRNKIADNERAQQHQHMNILPSSSTEYE  
VMPTFDSRNSLQVHVMDPNSHHSRQQLTALQLGYII

>Ash002061

MHRLYSSMSSRTL GAYARPTVEVQFSVHRQRPSAVAGKLQIKRIENSVNRQVTF SKRRNGLIK  
KAYELCVLCDIDIALIMFSPSHRLSLFSGRRRIEDVLAKYINLPEHDRGGSIVQNKEYLLRTLKLEKL  
CESDMAAQINKFFEPDPM TMTSLSALEPCEKFLMETLSRVNDRKKYLLSSHLAGVSACDPSASI  
QMYLQPHQEGLPSVFNNELVQWVPDGDSSNSNQPLFVNSDHLLSLSSNAPCVHAGRVKVATR  
GLLACRSGHGGCTVGLCSHAGRSSMVTIRKSLTLCAMRSTAKGRRKKGDNGMYNVISSAASI  
PVDPLVASDTWHQAYASTELLSALIPSPFPPLIQNSLA AVELPPAEGAASCPHVPGEDDGASRA  
EAYESNSGPANVG

>Ash015066

MGRGKIVIRRIDNSTSRQVTF SKRRNGLLKKARELAILCDAEVGLVIFSS TGRLYDFSSTSMKSVI  
ERYTKAKEQQVTNTTNDVRFWKEEATNLRQQLQNLQENHRKLMGEELSGLSFKDLQTLNRL  
EMSLRGVRMKKEQILSDEIQELNRKGYLIHQENMELYKKV NLLRQENMELYKKVFGSRDSNGE  
VINSSIIPLAIGMNEESSAAFSELELCQPQGPQPINATQPHDPELGLQLHQGKI QRESSFA

>Ash017092

MKGISDLLLALHCRSRGRKGRGMGRGKIAIRRIDNSATRQVTF SKRRNGLLKKARELAILCDAE  
VGLIVFSS TGRLYDFTNTSMKSVIERYNKAKEDHGVSPNANSEIKVWQKEAVSLRQQLHNLQE  
NHRQLMGENISQLSAKELQHLENQLETSLRAIRLKKKEEVLSDEVQELIHKVNLVHQENTELH KTI  
NISTKENMDLCKKLRGQAGVSNSTGLLRPCSEDLILFEICQPKKQTRVETDKLNLELCLH

>Ash100002

MGRGKIEIKRIESTTNRQVTFCKRRNGLLKKAYELSVLCDAEVALIVFSSRGRLYEYSNNSIRSTI  
ERYKKACADSASNSNSVVEVNSYEASKLRHQIQILQANRHLMGDSLSSLSIKELKQLESRLER  
GITRIRSKKHEMLFAEIEYMQKRETELQ TENMYLR TKMAENERAQEANIVANA AALGTLPTFDS  
RNYYHVNMLEAEASYPHSQDQTALHLGYDGKVDQTHNVI

>Ash002488

MEIGPGRCASSCARSTRPIGT CERDLSPVAVASCVRVYLQNKIVIANEPFGPQKNQKNPPVLFC  
GSSPKLKERSMGRGKIEIKRIENTTNRQVTFCKRRNGLLKKAYELSVLCDAEIALIVFSSRGRLY  
EYSNNSIKATIERYKKACADSSNSGSLVEVNSHQYYLQESAKLRHQIQLLQANRHLMGDGLS  
SLTVKELKQLENRLERGITRIRSKKEVELQNDNMYLRAKIAETEREQQANILQAGADFALPTFDS  
RSYYHVNMLEAASYTHHQEQ TALHLGYESKTDPGS

>Ash003251

MGRGKIEIKKIENPTNRQVTYSKRRAGIMKKARELTVLCDAEVSLIMFSS TGKFSEY CSPSADTK  
SMFDRYQQVSAINLWSAQYEKMQNTLKHLDINDEL RKEIRHRMGEDLDGLDIKELRGLEQNM  
DEALKIVRNRKYHVITTQDTDFK KKLKNSEETHKGLLRELEMNEEQAMFGYVEDDPSSSYEGAL



ALANGGPHIYAFRVQPSQPNLHGMGCRSHDLRLA

>Ash007674

MVRGKTEMRRINSTSRQVTFKRRNGLLKKAFELSVLCDAEVGLIVFSPRGKLYEFASSSMQ  
KTIERYKQRAKDMCGNGRATDPLNLEQWKLDAEALAKKTEVLEISKRKLMGEDLESCSVEELR  
KLEDQLEQSLSKIRRRKNSLLSEQVEELKEKEKILLEENSLKQYSRLLSSASCKEAVIPQEEN  
EHSKEVETELYIGWPERGRNQQLMNSKGEESVIDSDVQTRGKL

>Ash016527

MAREKIKIRKIDNATARQVTFKRRRGLFKKAQELSILCDAEVGLIIFSSTGKLFQYSSSSMKDVI  
ERRGLHSKNIQQNPDPYPSIDLQLDGNADTARLSKQAAELSVQLRNMRGEDIDKLTVEELQKIES  
SLELGLNRVMEKKNQQIIEQINDLQQKGVKLMEENARLRHRVGMAGRSATNDSENAENTV  
FEDGQSSEICISDISHLGGPQELNENDNISLKLGLPCSHWK

>Ash010253

MGRGKIVIRRIDNSTSRQVTFKRRNGLLKKAKELAILCDAEVGLVIFSGTGRLYDYSSTSMKSV  
FDRYKKAKGESHMTTASEARIWQEEAANLRQQQLNQLQENQRKLTGEELSGLSVKDLQNLNENR  
LEMSLRGVRMKKEQILKDEIQELNRKGYLVHQENLELYKKLNLIQENLELYKKVLNKS

>Ash017552

MAREKIQIRKIHNATARQVTFKRRRGLFKKAEELAILCDAEVGLIVFSATGKLFEFSSSSLSEIIE  
KHKMHSKDPPKPNQPSLDLQLENGNHAMLSKQVQEATRQLRNMRGEDLQGLNIEELQKLEKT  
LETGLSHVLSKKGQQIMDQINHLRKKGMQLLAENKRLRQQMAEISKMGKQVVADSDRVNYEE  
GQSSESVTNLTHAGPPHESHNDYSSDTSRLGLLSCPGWK

>Ash100001

MGRGKIAIRRIDNSASRQVTFKRRRTGLLKKAKELSILCDAEVGLIVFSGAGRLYEFASSRFVILP  
RSHSPTSPSLSLSLSLSLSLSIYIYIYIYTYNIYFYIYIYIYIYN

>Ash000481

MARGKVQMRRIENPVHRQVTFCKRRAGLLKKAKELSVLCDADIGIIIFSTHGKLYELATNGTMR  
DLIERYRQSCGETQNVGDSTQPKEITQEITSLKNEIDLLQKGLRHMLGKADVGYVTLEELHALEK  
HLEIWMNYVRSKMLMFQEIQTLKNKEGVLKATNELLQEKIIEQTGHFDIAHIIEDNGFFTMTP  
NIADIPYPLTIQNTLYQI

>Ash002504

MWVIMGRGRMEIKKIENPTQRQSTFYKRRDGLFKKARELAVLCDVDLLLLLFSSSGKLYHYHSP  
TVPNVQELIERYEKAVEKKVLEDGSGDERREMEEVGRLEALEREMRFMQVDEKEDYSLADL  
QMVERNLEAAINKVIRGEMETKIHKEMEKLHDMVKQRQQEGYSLCEELSHGSGHEEQESEELD  
LKLGF

>Ash015782

MVRGRTVLRRIENSASRQVAFSKRRNGLLKKAFELSVLCDAEYVIVFSPRGKLYEFASSMQ  
ETLKRYKIHARDLCSNSRASEEGTQQRMHVTVVAENIDLLEDSKRKLMGENLESCSWNELHE  
LEDQMERGLRNIRGRKNQLLEEQVEQLKDWERQLQEENALLQKQRKVPLLHLKAQELTAAQE  
DNLHVDVETDLYIGCPGRGRTEQLQEE

---

## Supplementary References

1. De Bie, T., Cristianini, N., Demuth, J. P. & Hahn, M. W. CAFE: a computational tool for the study of gene family evolution. *Bioinformatics* **22**, 1269–1271 (2006).
2. Ibrahim, R. K. *et al.* Enzymology and compartmentation of polymethylated flavonol glucosides in *Chrysosplenium americanum*. *Phytochemistry* **26**, 1237–1245 (1987).
3. Mouradov, A. & Spangenberg, G. Flavonoids: a metabolic network mediating plants adaptation to their real estate. *Front. Plant Sci.* **5**, 620, doi: 10.3389/fpls.2014.00620 (2014).
4. Duan, D. *et al.* Genetic diversity of stilbene metabolism in *Vitis sylvestris*. *J. Exp. Bot.* **66**, 3243–3257 (2015).
5. Schnee, S., Viret, O. & Gindro, K. Role of stilbenes in the resistance of grapevine to powdery mildew. *Physiol. Mol. Plant Pathol.* **72**, 128–133 (2008).
6. Lu, H. *et al.* Subfamily-specific fluorescent probes for cysteine proteases display dynamic protease activities during seed germination. *Plant Physiol.* **168**, 1462–1475 (2015).
7. Zhang, D. *et al.* The cysteine protease CEP1, a key executor involved in tapetal programmed cell death, regulates pollen development in Arabidopsis. *Plant Cell* **26**, 2939–2961 (2014).
8. Cai, J. *et al.* The genome sequence of the orchid *Phalaenopsis equestris*. *Nat. Genet.* **47**, 65–72 (2015).
9. Zhang, G.-Q. *et al.* The *Dendrobium catenatum* Lindl. genome sequence provides insights into polysaccharide synthase, floral development and adaptive evolution. *Sci. Rep.* **6**, 19029; doi: 10.1038/srep19029 (2016).
10. Vanneste, K., Baele, G., Maere, S. & Van de Peer, Y. Analysis of 41 plant genomes supports a wave of successful genome duplications in association with the Cretaceous–Paleogene

- boundary. *Genome Res.* **24**, 1334–1347 (2014).
11. Ramírez, S. R. *et al.* Dating the origin of the Orchidaceae from a fossil orchid with its pollinator. *Nature* **448**, 1042–1045 (2007).
  12. Gustafsson, A. L. S., Verola, C. F. & Antonelli, A. Reassessing the temporal evolution of orchids with new fossils and a Bayesian relaxed clock, with implications for the diversification of the rare South American genus *Hoffmannseggella* (Orchidaceae: Epidendroideae). *BMC Evol. Biol.* **10**, 177, doi: 10.1186/1471-2148-10-177 (2010).
  13. Chen, S. C. *et al.* Networks in a large-scale phylogenetic analysis: reconstructing evolutionary history of Asparagales (Lilianaes) based on four plastid genes. *PLoS ONE* **8**(3), e59472 (2013).
  14. Chomicki, G. *et al.* The velamen protects photosynthetic orchid roots against UV-B damage, and a large dated phylogeny implies multiple gains and losses of this function during the Cenozoic. *New Phytol.* **205**, 1330–1341 (2014).
  15. Givnish, T. J. *et al.* Orchid phylogenomics and multiple drivers of their extraordinary diversification. *Proc. R. Soc. B* **282**, 1553; doi.org/10.1098/rspb.2015.1553 (2015).
  16. Givnish, T. J. *et al.* Orchid historical biogeography, diversification, Antarctica and the paradox of orchid dispersal. *J. Biogeogr.* **43**, 1905–1916 (2016).
  17. Jiao, Y. N., Li, J. P., Tang, H. B. & Paterson, A. H. Integrated syntenic and phylogenomic analyses reveal an ancient genome duplication in monocots. *Plant Cell* **26**, 2792–2802 (2014).
  18. Ming, R. *et al.* The pineapple genome and the evolution of CAM photosynthesis. *Nat. Genet.* **47**, 1435–1442 (2015).
  19. Liu, Y. *et al.* Functional conservation of MIKC\*-type MADS box genes in *Arabidopsis* and

- rice pollen maturation. *Plant Cell* **25**, 1288–1303 (2013).
20. Kwantes, M., Liebsch, D. & Verelst W. How MIKC\* MADS-box genes originated and evidence for their conserved function throughout the evolution of vascular plant gametophytes. *Mol. Biol. Evol.* **29**, 293–302 (2012).
  21. Honys, D. & Twell, D. Transcriptome analysis of haploid male gametophyte development in *Arabidopsis*. *Genome Biol.* **5**, R85, doi: 10.1186/gb-2004-5-11-r85 (2004).
  22. Verelst, W., Saedler, H. & Münster, T. MIKC\* MADS-protein complexes bind motifs enriched in the proximal region of late pollen specific *Arabidopsis* promoters. *Plant Physiol.* **143**, 447–460 (2007).
  23. Adamczyk, B. J. & Fernandez, D. E. MIKC\* MADS domain heterodimers are required for pollen maturation and tube growth in *Arabidopsis*. *Plant Physiol.* **149**, 1713–1723 (2009).
  24. Wolter, M. & Schill, R. Ontogenie von pollen, massulae und pollinien bei den orchideen. *Tropische und Subtropische Pflanzenwelt* **56**, 1–93 (1986).
  25. Dressler, R. L. *Phylogeny and Classification of the Orchid Family* (Portland, OR: Discorides Press, 1993).
  26. Tapia-López, R. *et al.* An *AGAMOUS*-related MADS-box gene, *XAL1* (*AGL12*), regulates root meristem cell proliferation and flowering transition in *Arabidopsis*. *Plant Physiol.* **146**, 1182–1192 (2008).
